# Supplementary material for: Synthesis, in vitro biological evaluation and in silico studies of novel pyrrolidine derived thiosemicarbazones as dihydrofolate reductase inhibitors
Source: Royal Society of Chemistry journal article supplement (doi:10.1039/d4ra05071a), 2024-01-01
Supplement: d4ra05071a1.pdf [file d4ra05071a1.pdf]

## Molecular Docking Molecular Dynamics Simulation Studies

For molecular docking studies BioSolveIT's LeadIT software was used [www.biosolveit.de/LeadIT](http://www.biosolveit.de/LeadIT). For visualization of docked conformations, Desmond Molecular Dynamics (D.E. Shaw Research) on Schrödinger Maestro 2023.4 software was opted to perform Molecular Dynamic Simulations study<sup>1</sup>. In Molecular Dynamics Simulations the complex of **5d** with hDHFR was first prepared with Protein Preparation Workflow by options opting for replacing hydrogens, assigning bond orders, using CCD database, creating zero-order bonds to metals and disulfide bonds, and deleting waters beyond 0 Å from het groups. In the refine tab, sample water orientations, use PROPKA pH 7.4 option was opted and the structure was optimized. In system builder panel, TIP3P solvent model was used for solvation in the orthorhombic box using buffer settings with 10 Å x 10 Å x 10 Å and minimized volume option was used, then Ions placement (default-recalculated) with salt addition (0.15M NaCl) was carried out. Complex of **5d** with hDHFR after solvation resulted in 23599 atoms. In molecular dynamics panel, 100ns (nanoseconds) simulation time was entered, while recording interval was set to 100ps (picoseconds), with energy option at 1.2, it resulted in approximation for 1000 frames. For final run, NPT ensemble class was opted at 300.0 Kelvin with Nosé-Hoover chain temperature coupling and 1.01325 bar pressure with Martyna-Tobias-Klein pressure coupling. The system followed the default relaxation protocol before the simulation, which included small simulations, using NVT and NPT ensembles with different restraints parameters.

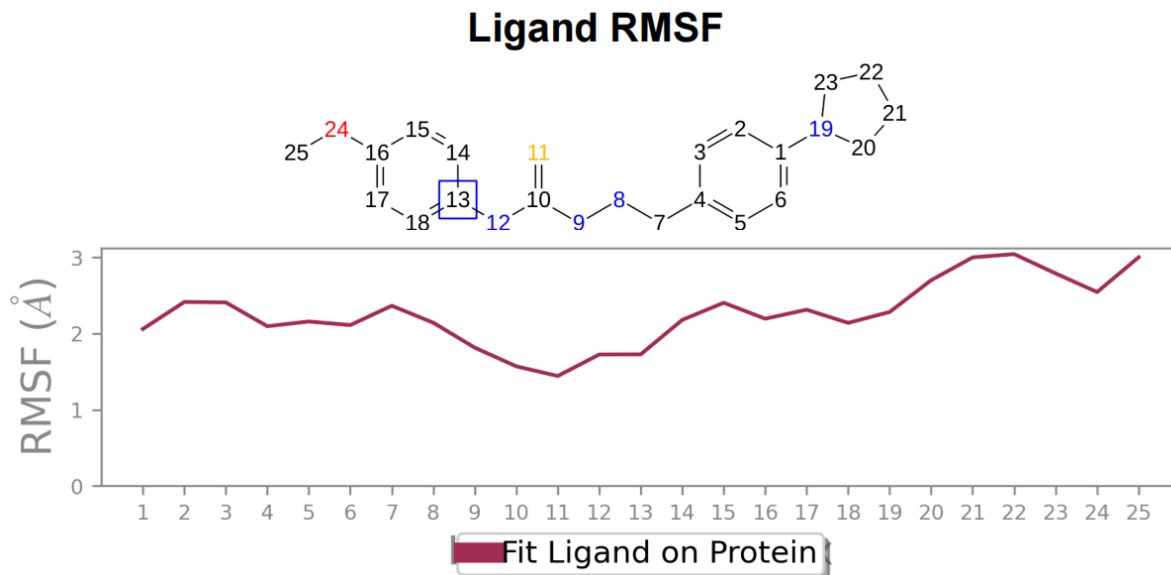

SI Figure 1. Ligand RMSF.

## Protein-Ligand Contacts

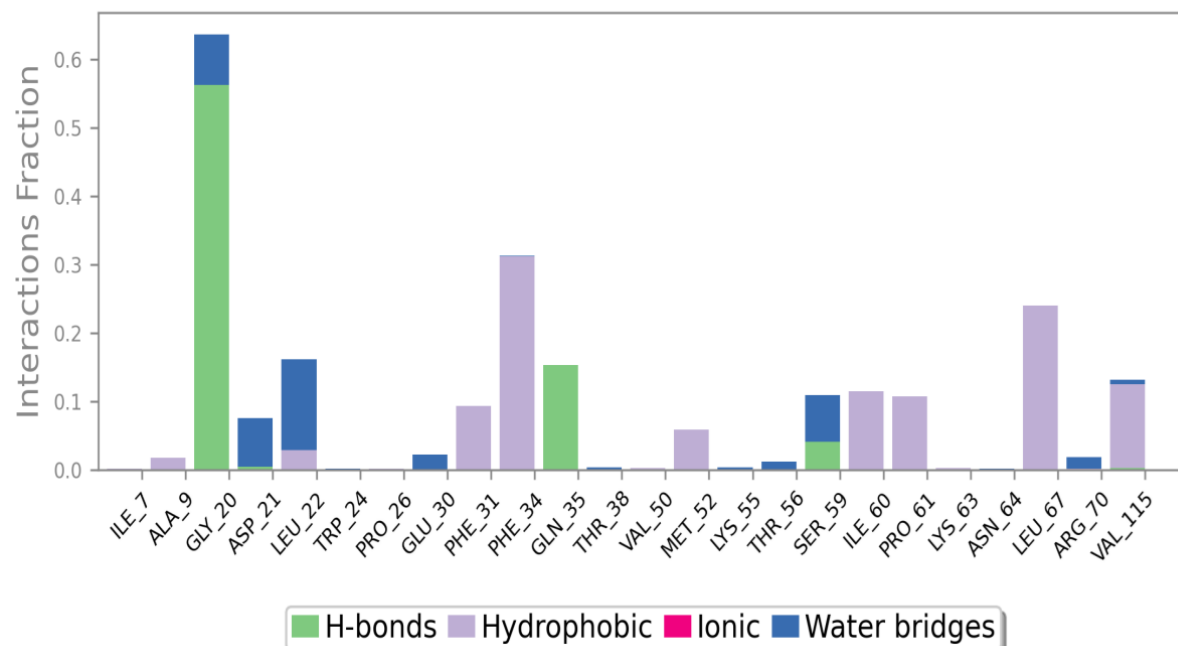

SI Figure 2. Protein-Ligand interaction fraction graph of 5d-hDHFR complex.

## Ligand Torsion Profile

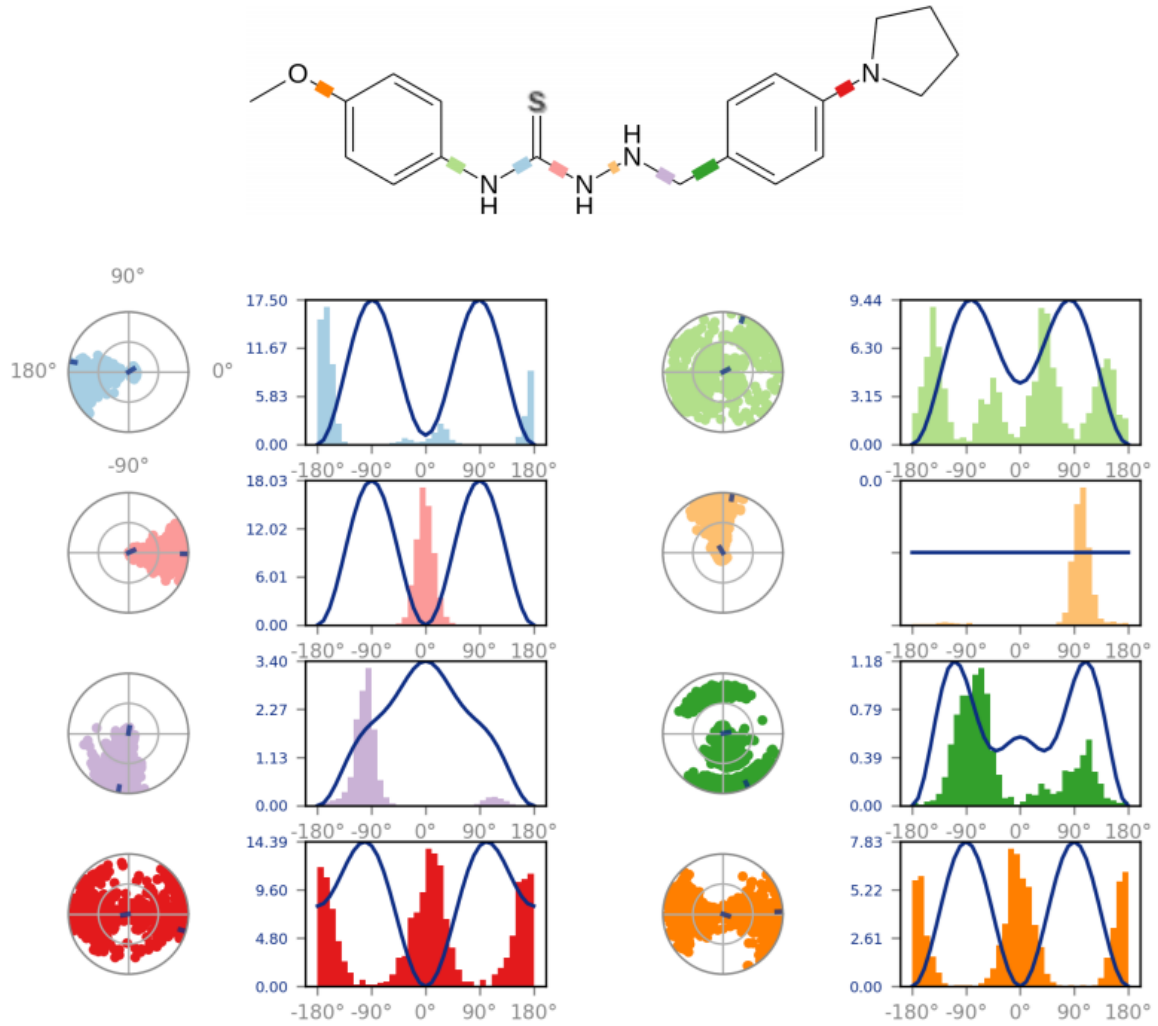

SI Figure 3. Torsion profile of ligand 5d.

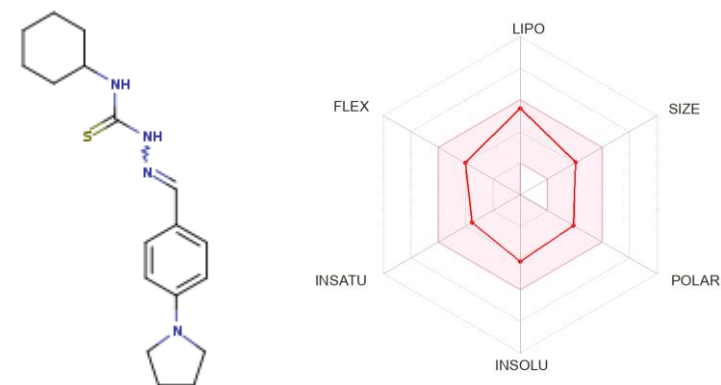

Bioavailability radar diagram for compound 5a.

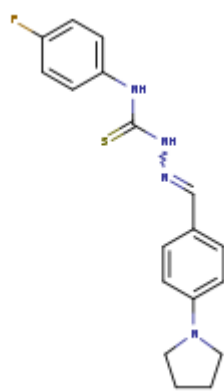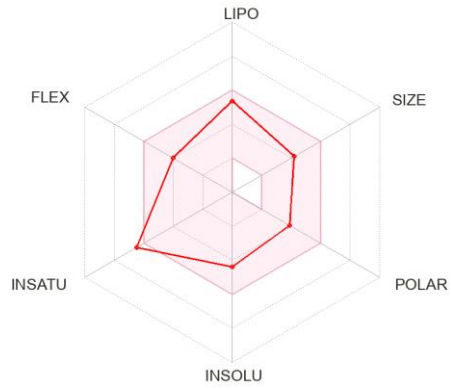

Bioavailability radar diagram for compound 5b.

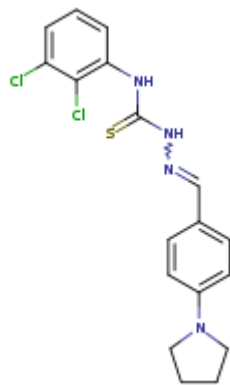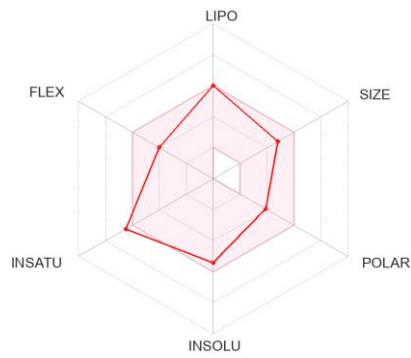

Bioavailability radar diagram for compound 5c.

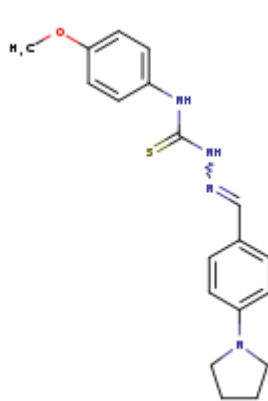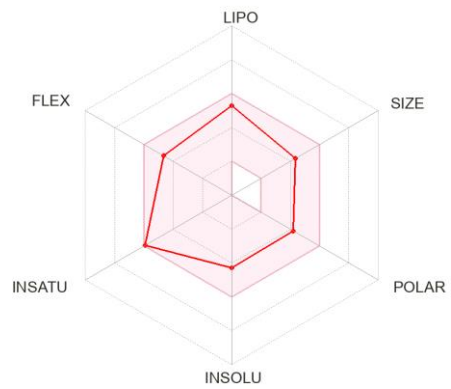

Bioavailability radar diagram for compound 5d.

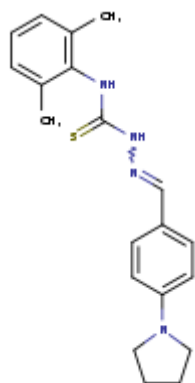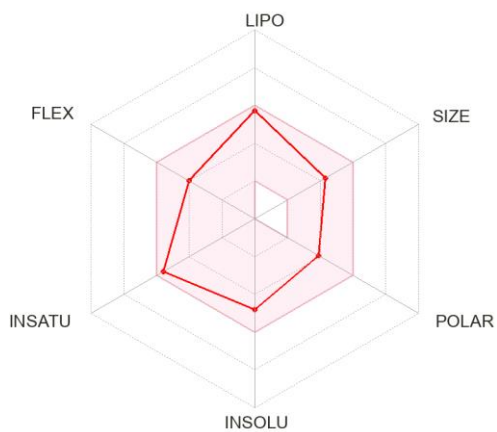

Bioavailability radar diagram for compound 5e.

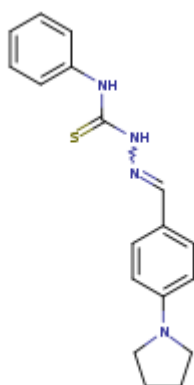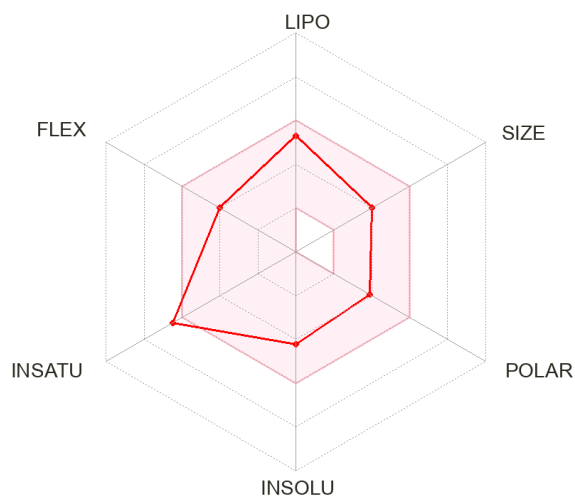

Bioavailability radar diagram for compound 5f.

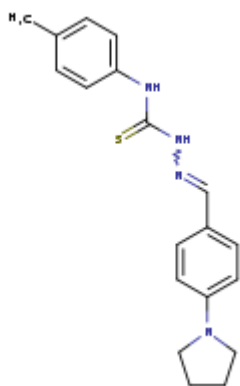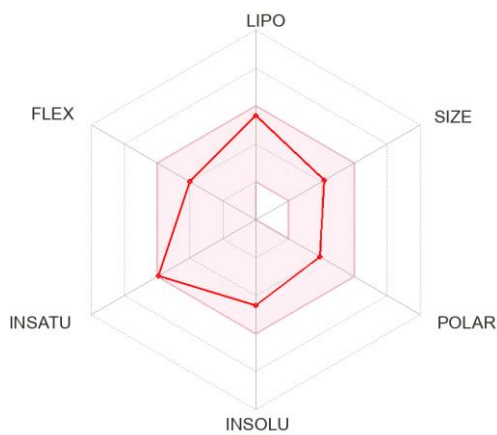

Bioavailability radar diagram for compound 5g.

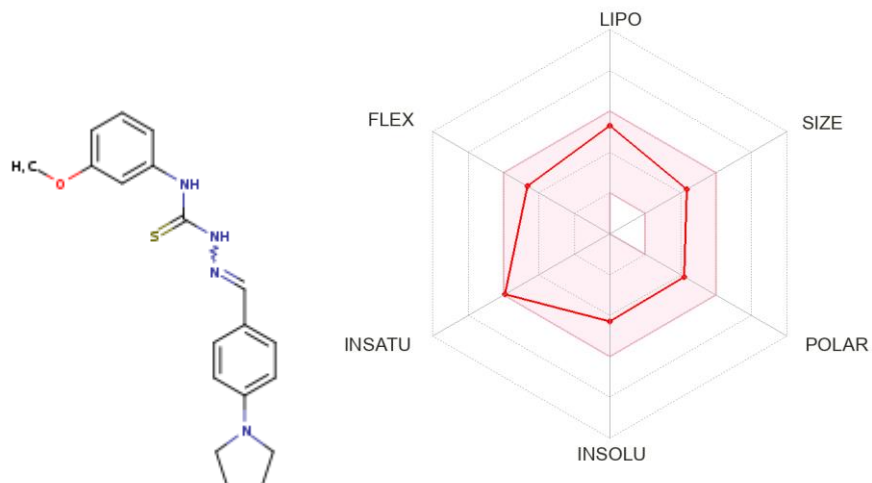

Bioavailability radar diagram for compound 5h.

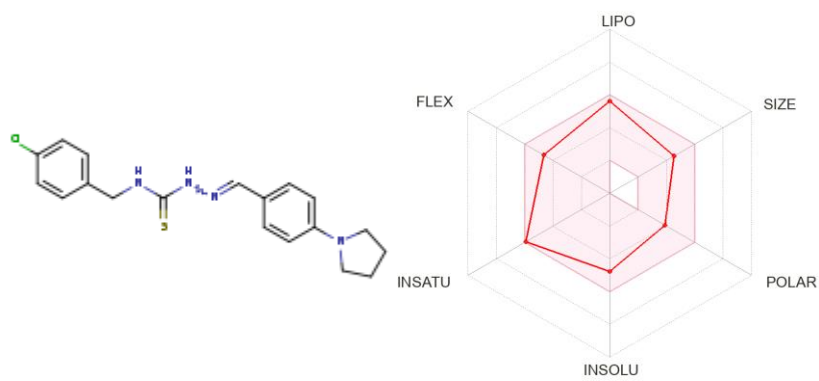

Bioavailability radar diagram for compound 5i.

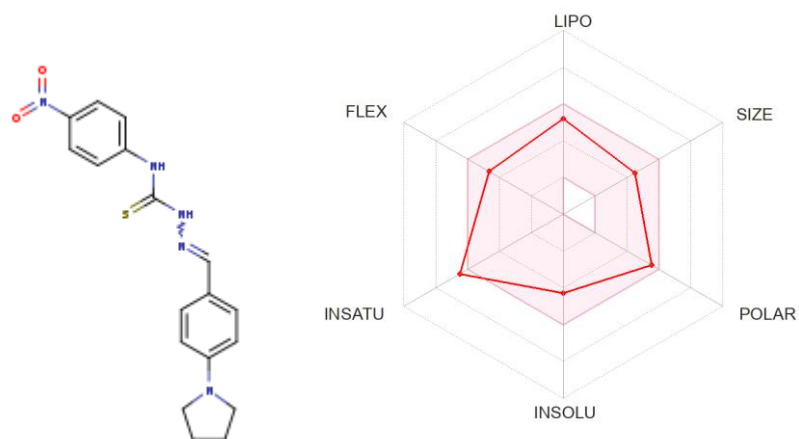

Bioavailability radar diagram for compound 5j.

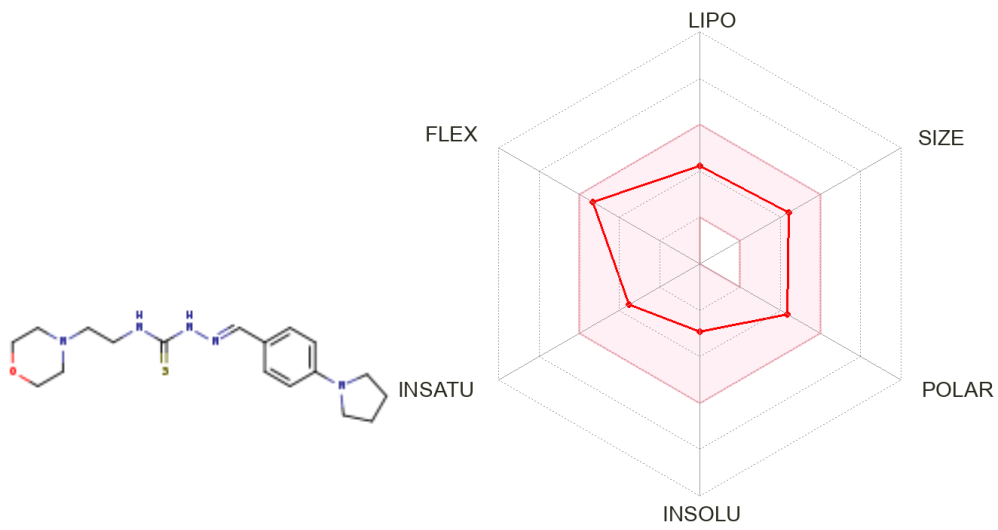

Bioavailability radar diagram for compound 5k.

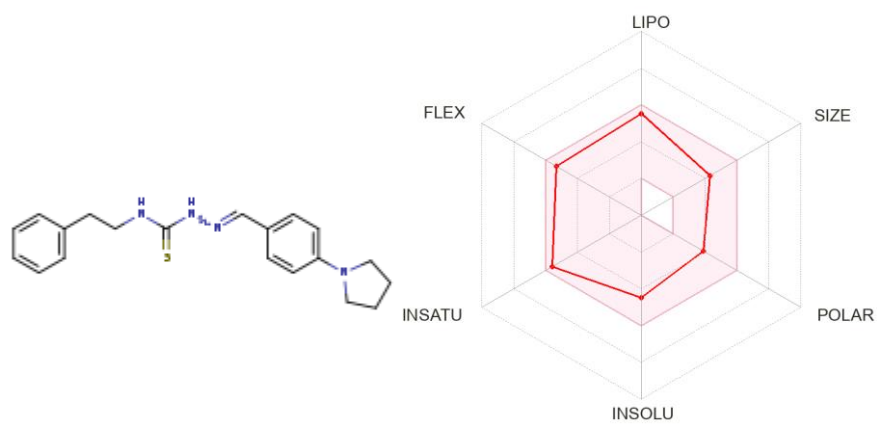

Bioavailability radar diagram for compound 5l.

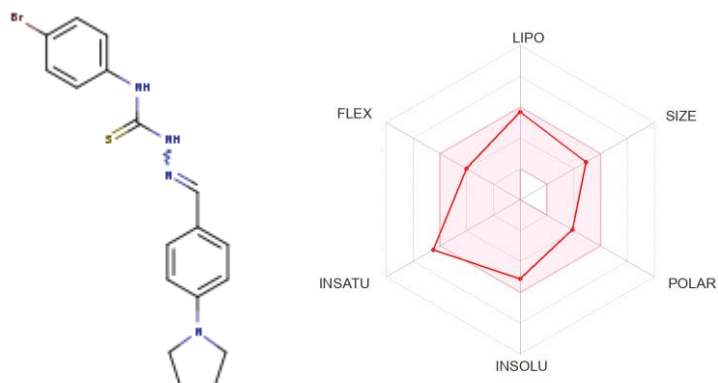

Bioavailability radar diagram for compound 5m.

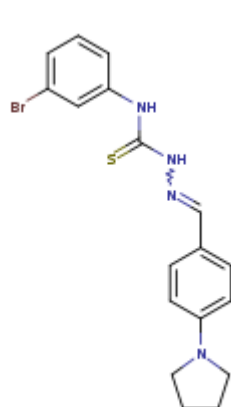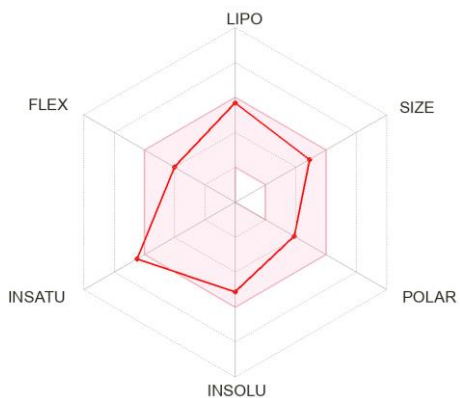

Bioavailability radar diagram for compound 5n.

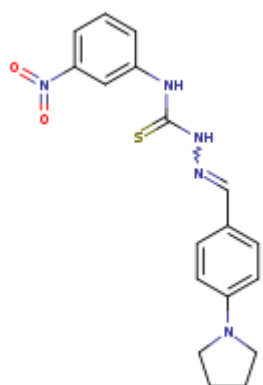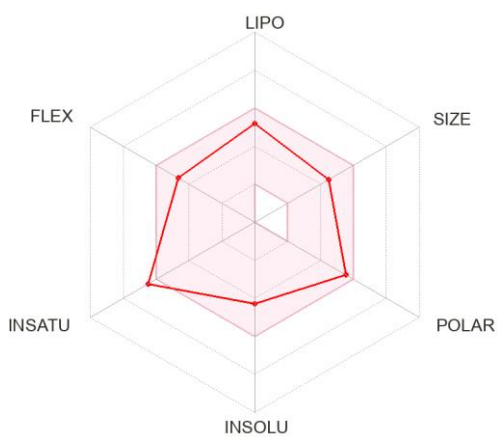

Bioavailability radar diagram for compound 5o.

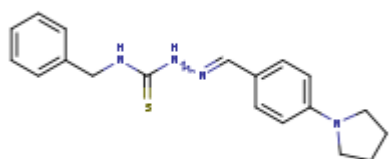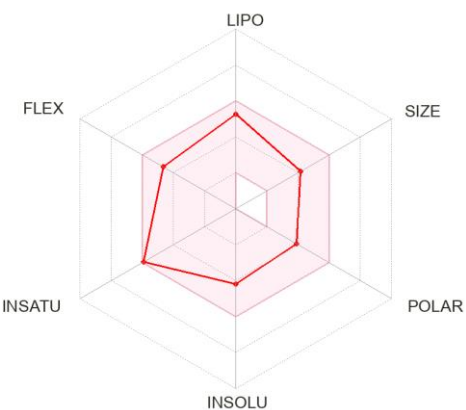

Bioavailability radar diagram for compound 5p.



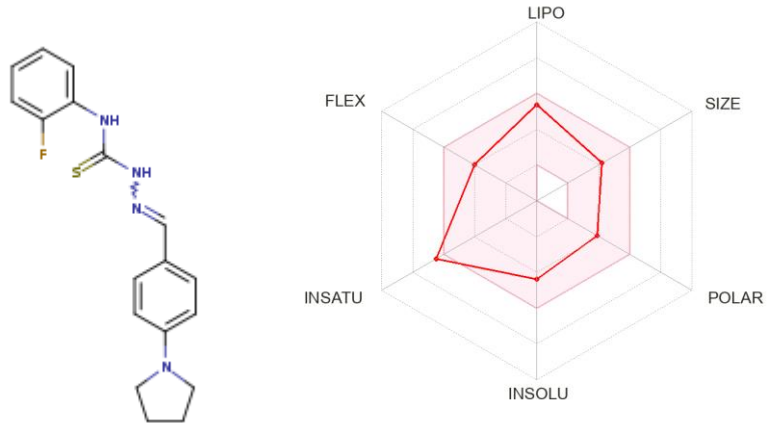

Bioavailability radar diagram for compound 5q.

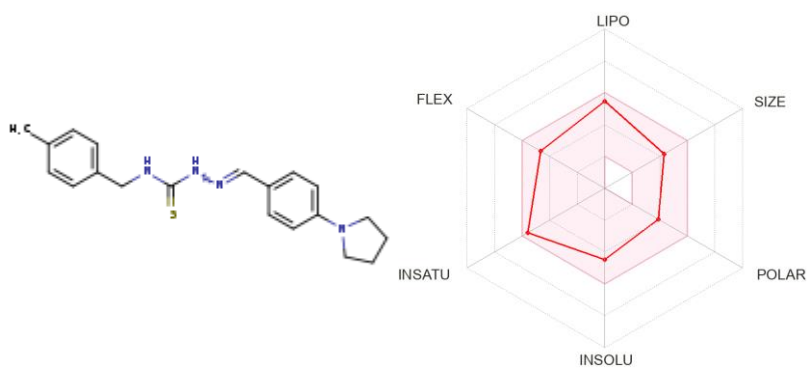

Bioavailability radar diagram for compound 5r.

### **<sup>1</sup>H-NMR and <sup>13</sup>C-NMR of Synthesized compounds 5(a-r)**

### 1H NMR, 600 MHz, DMSO-d6 of 5a

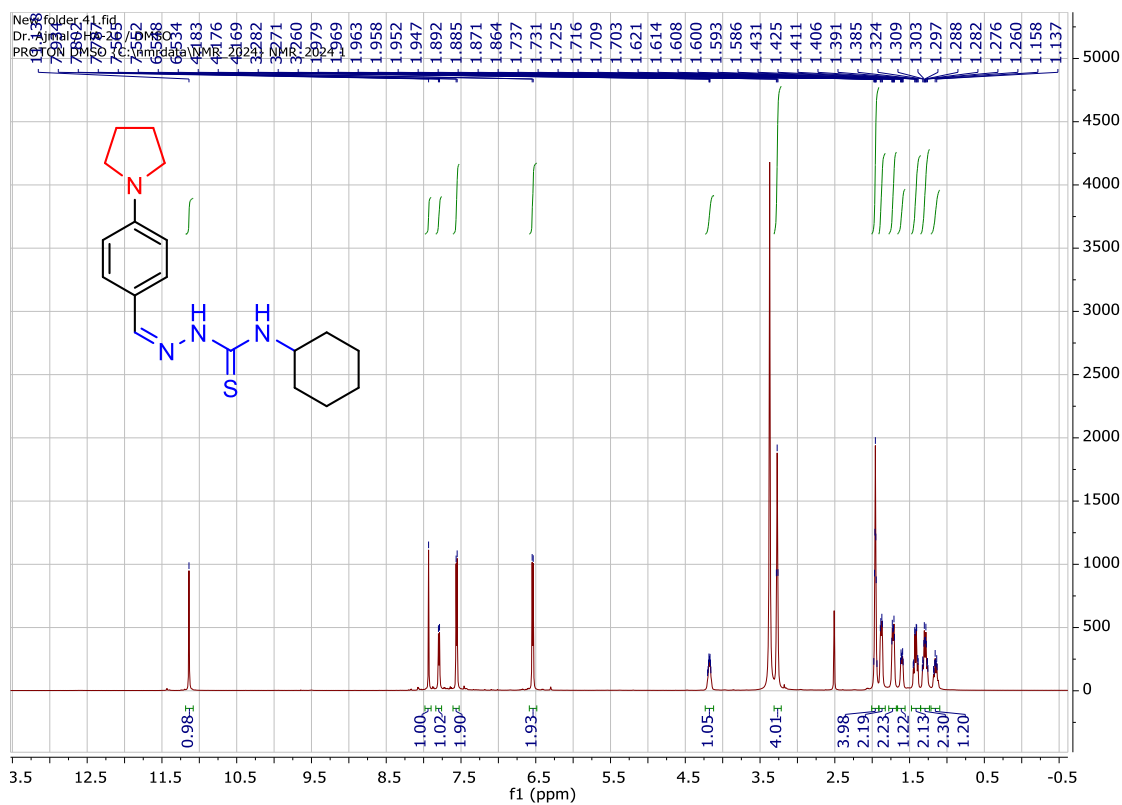

### 13C NMR, 100 MHz, DMSO-d6 of 5a

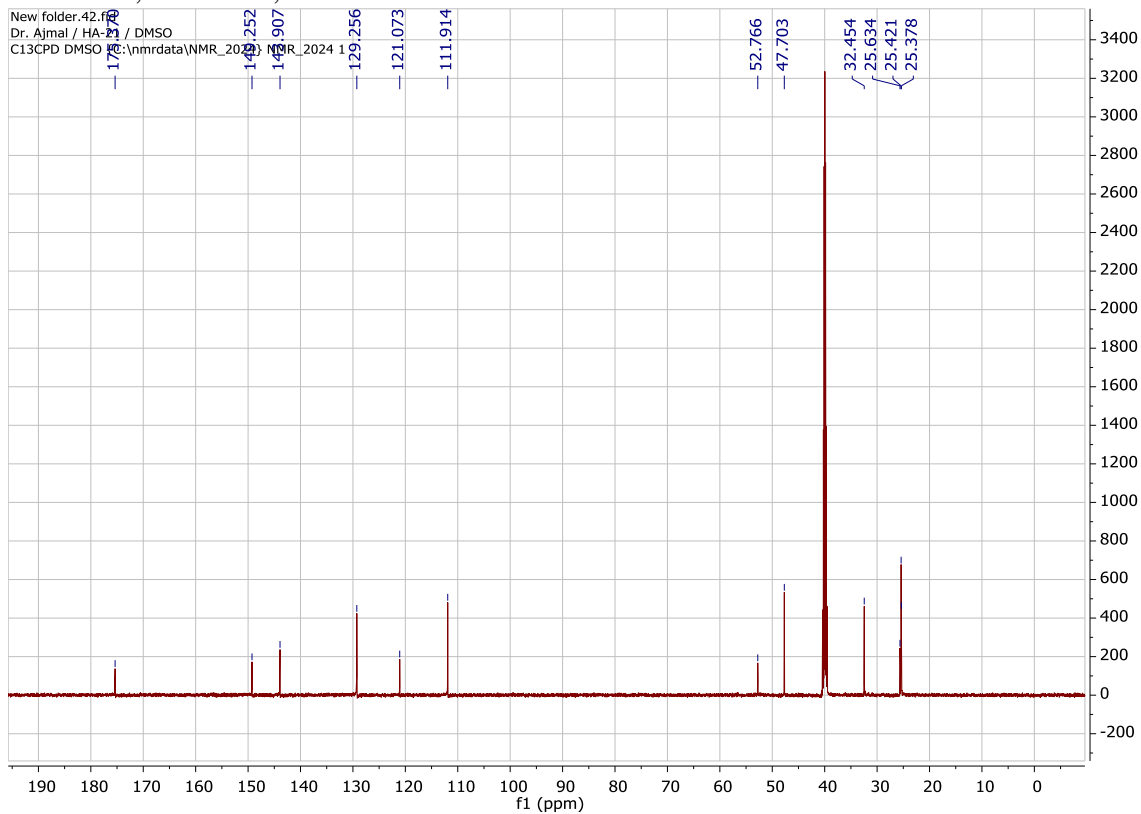

### <sup>1</sup>H NMR, 600 MHz, DMSO-d<sub>6</sub> of 5b

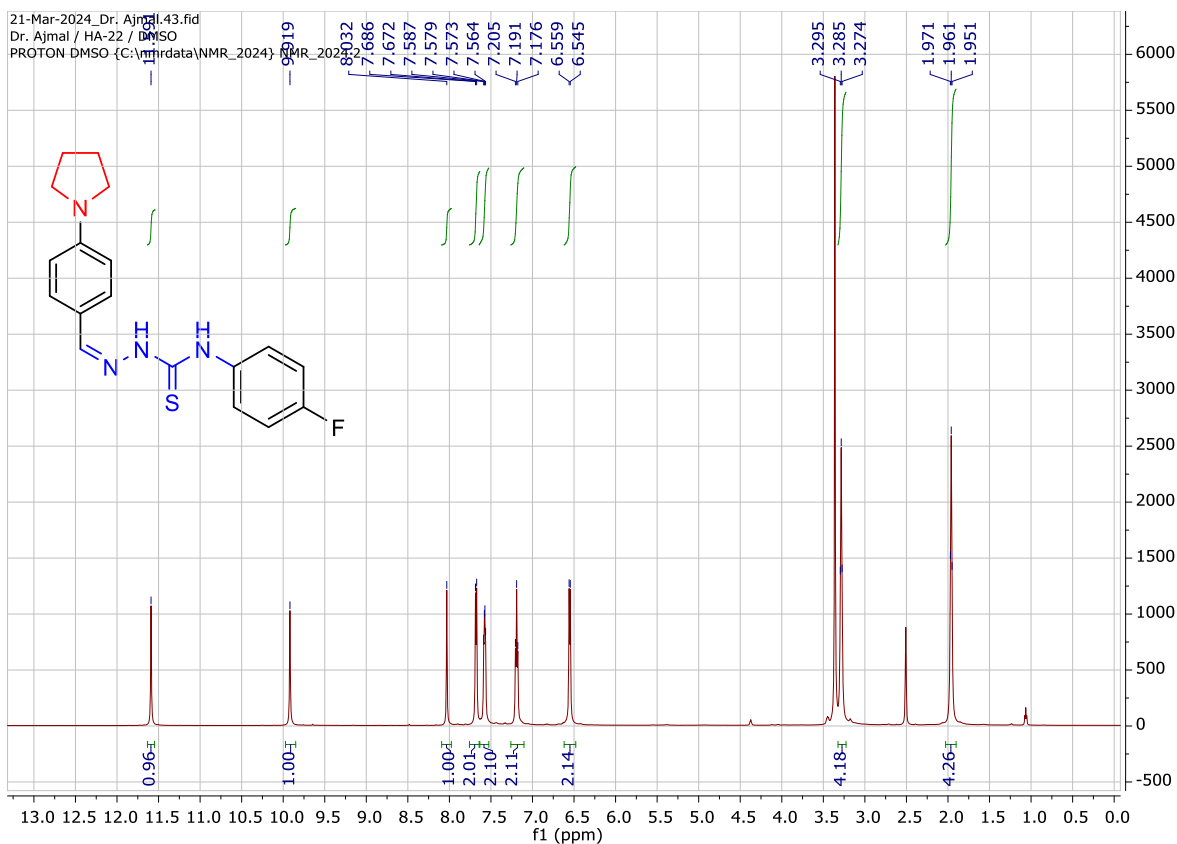

### <sup>13</sup>C NMR, 151 MHz, DMSO-d<sub>6</sub> of 5b

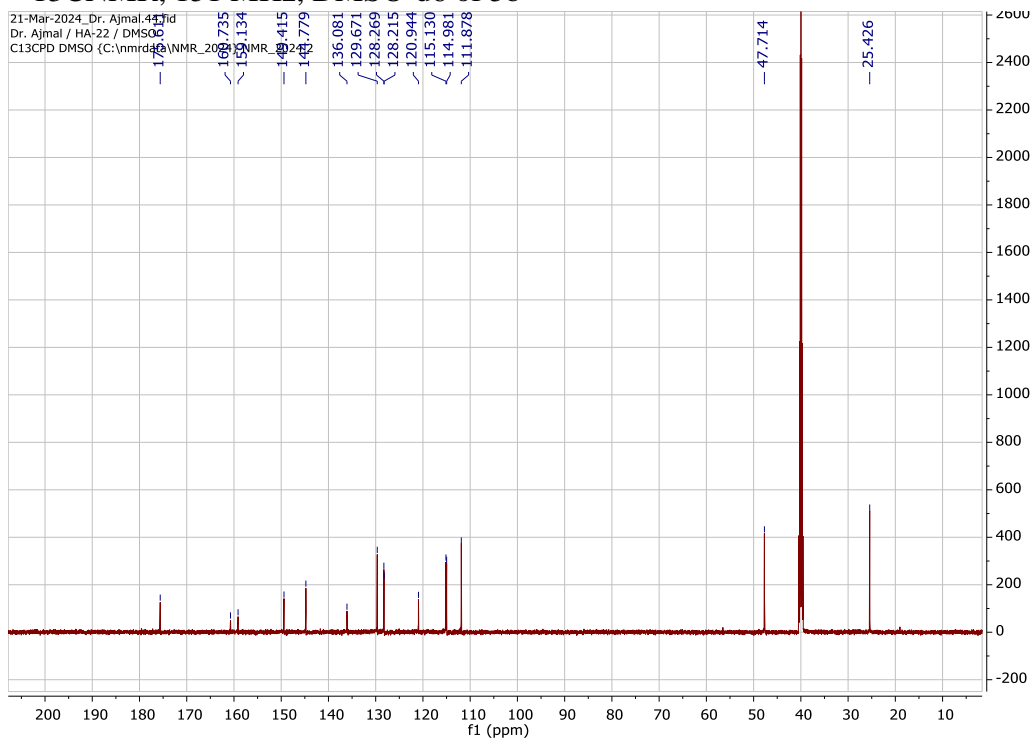

### 1H NMR, 600 MHz, DMSO-d6 of 5c

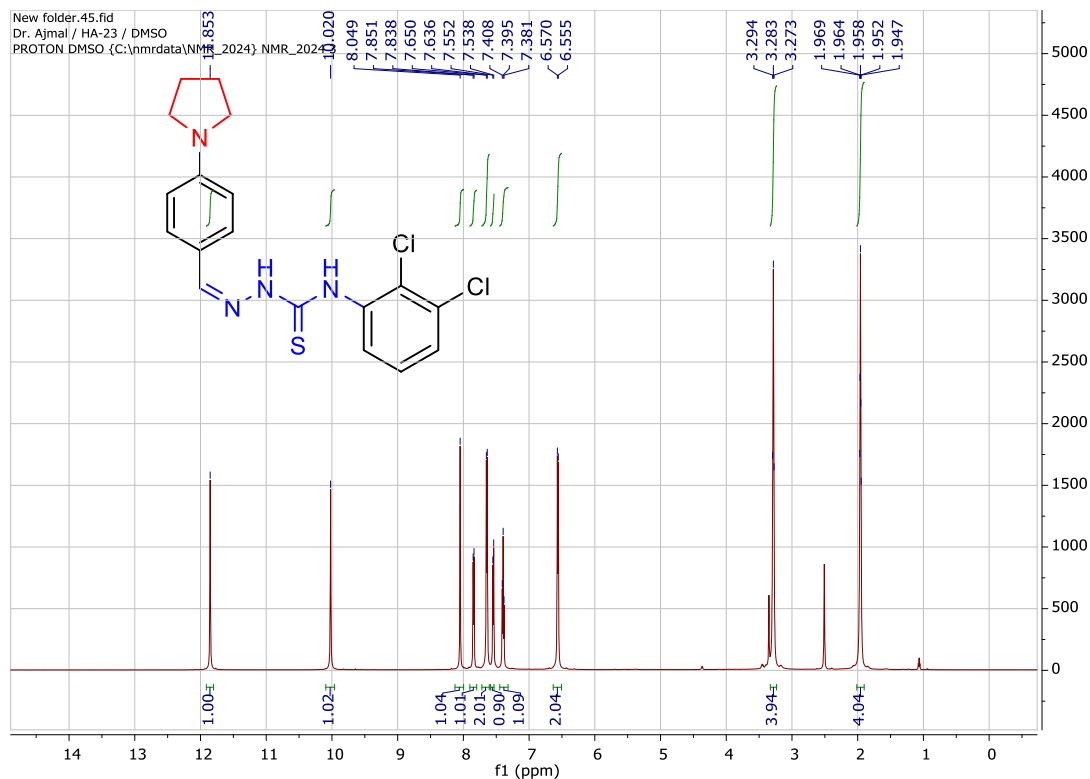

### 13C NMR, 151 MHz, DMSO-d6 of 5c

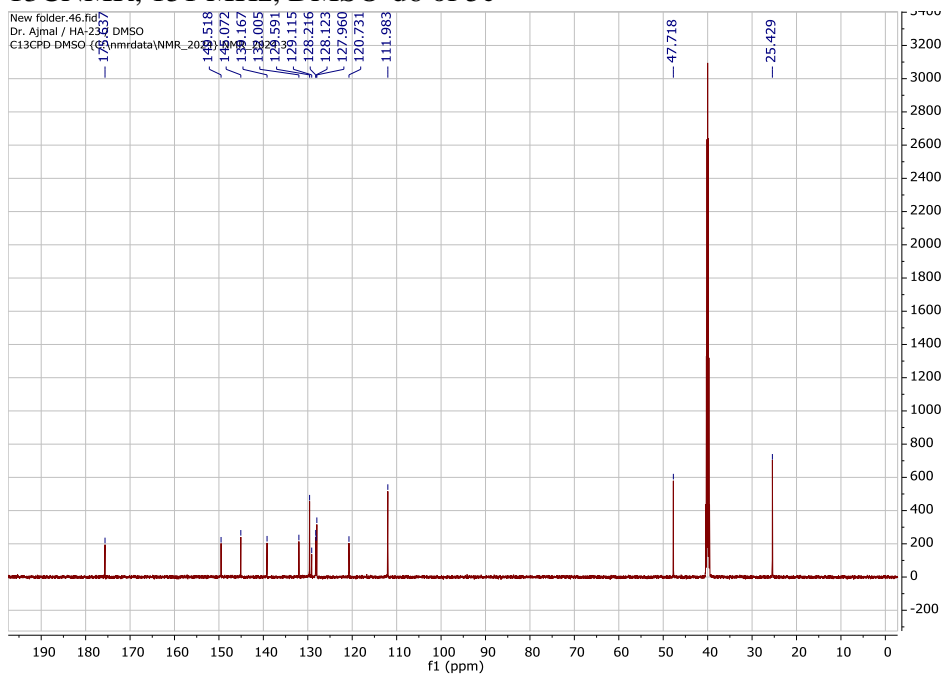

### <sup>1</sup>H NMR, 600 MHz, DMSO-d<sub>6</sub> of 5d

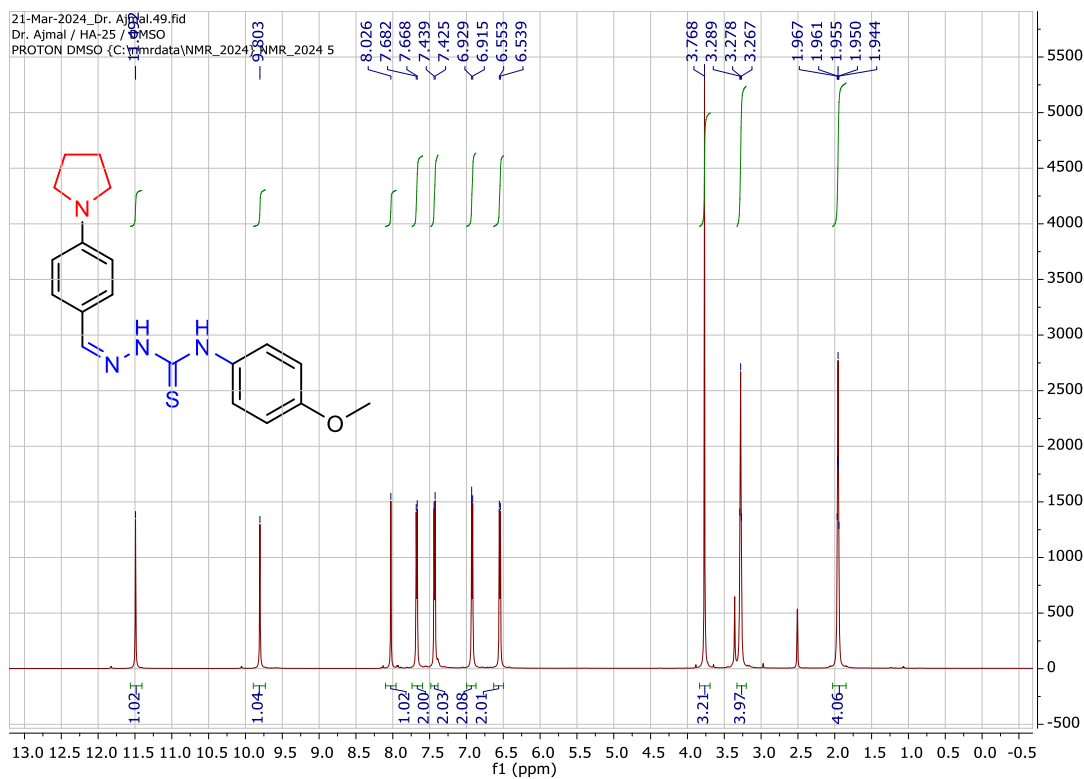

### <sup>13</sup>C NMR, 151 MHz, DMSO-d<sub>6</sub> of 5d

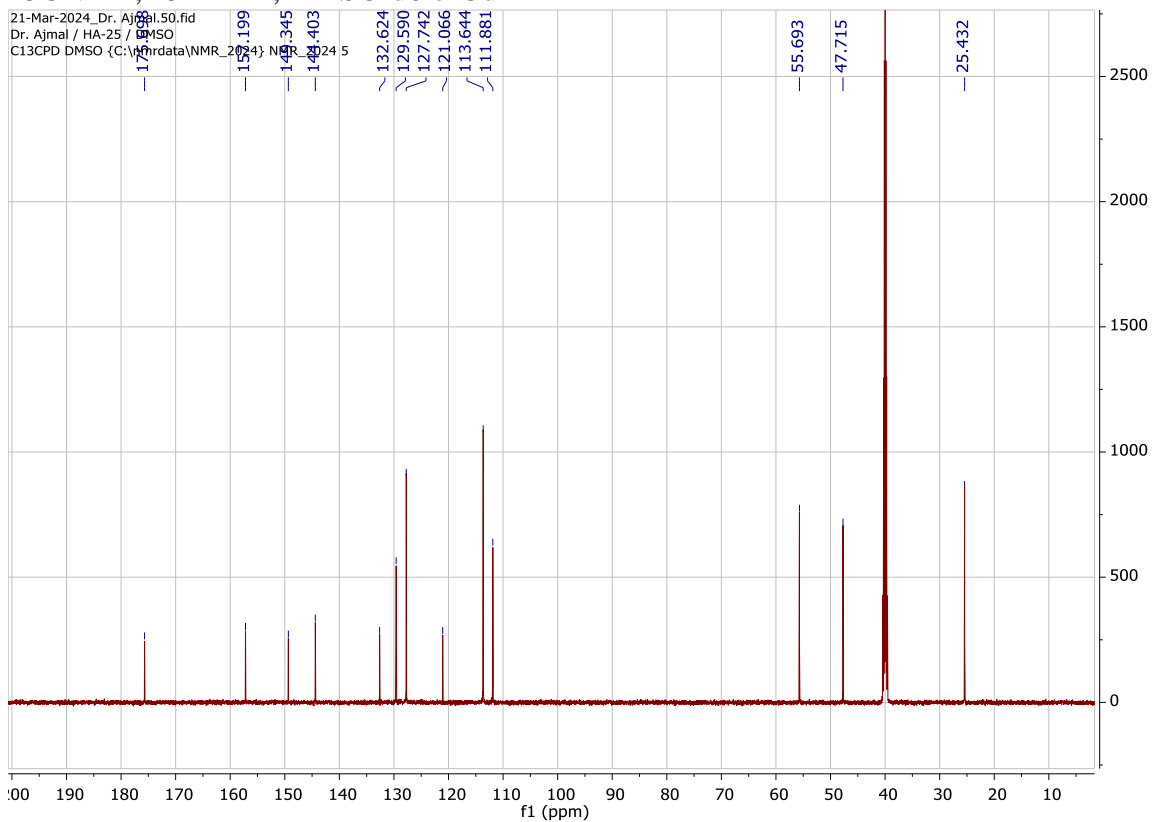

### 1H NMR, 600 MHz, DMSO-d6 of 5e

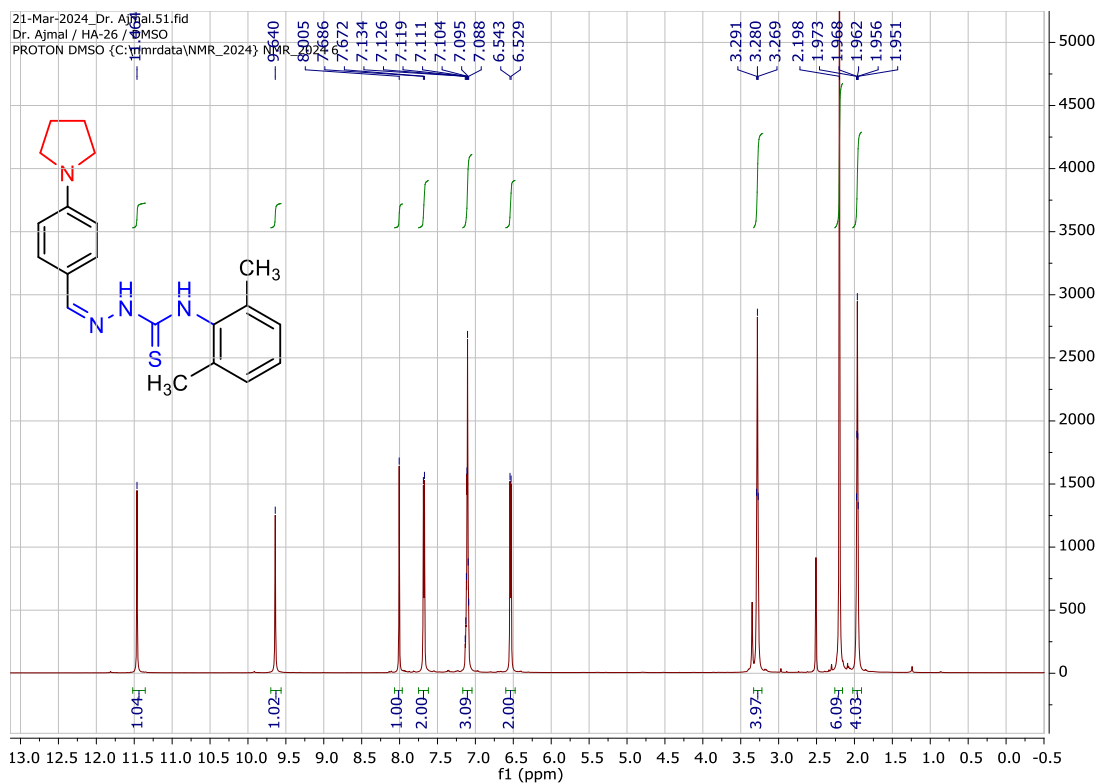

### 13C NMR, 151 MHz, DMSO-d6 of 5e

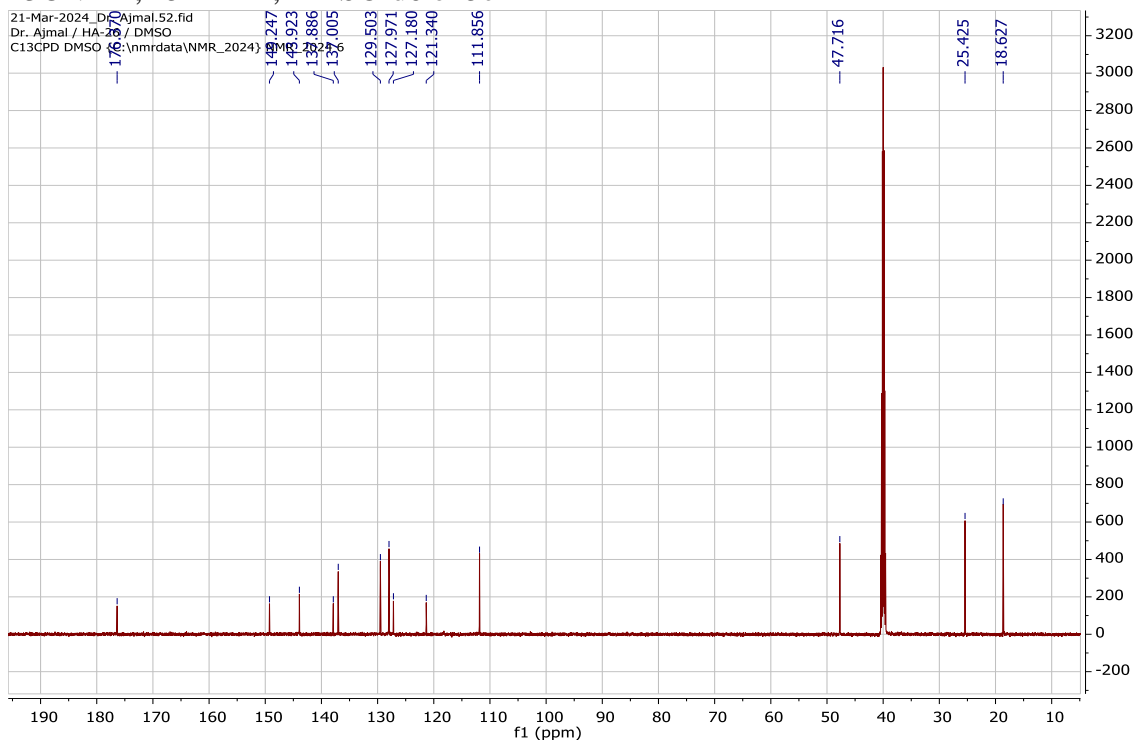



### <sup>13</sup>CNMR, 151 MHz, DMSO-d6 of 5f

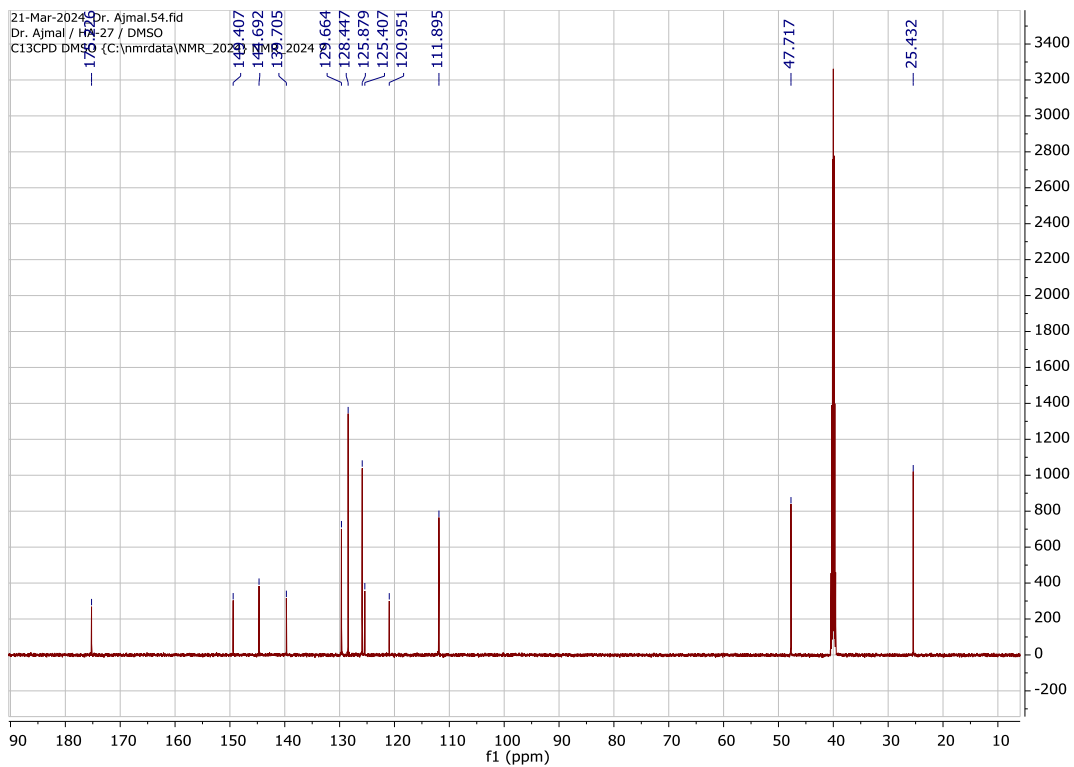

### <sup>1</sup>HNMR, 600 MHz, DMSO-d6 of 5g

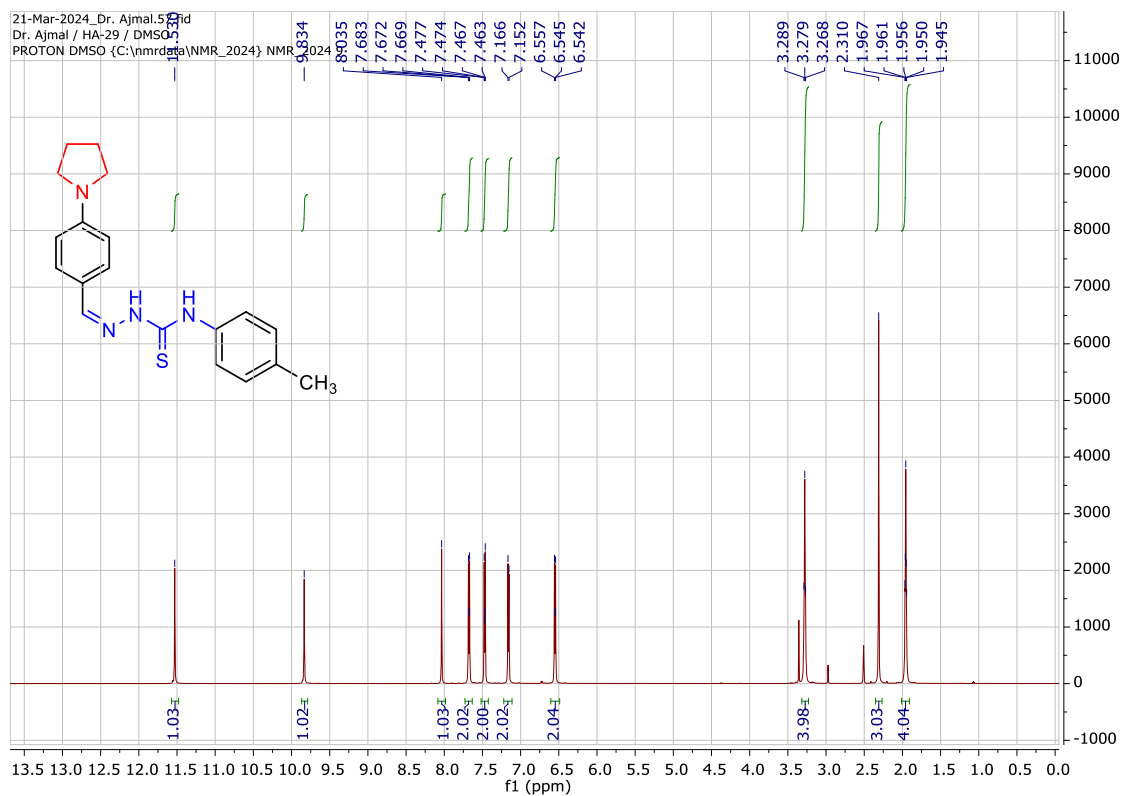





### <sup>13</sup>CNMR, 151 MHz, DMSO-d<sub>6</sub> of 5h

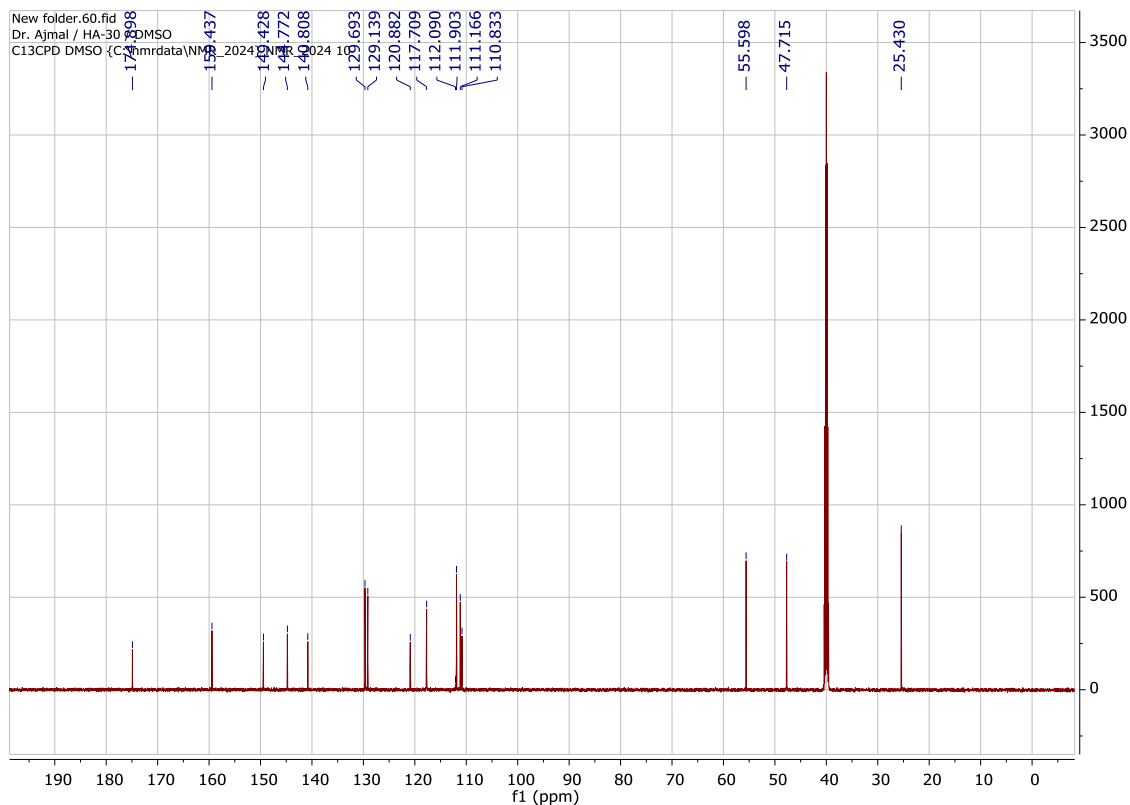

### <sup>1</sup>H NMR, 600 MHz, DMSO-d<sub>6</sub> of 5i

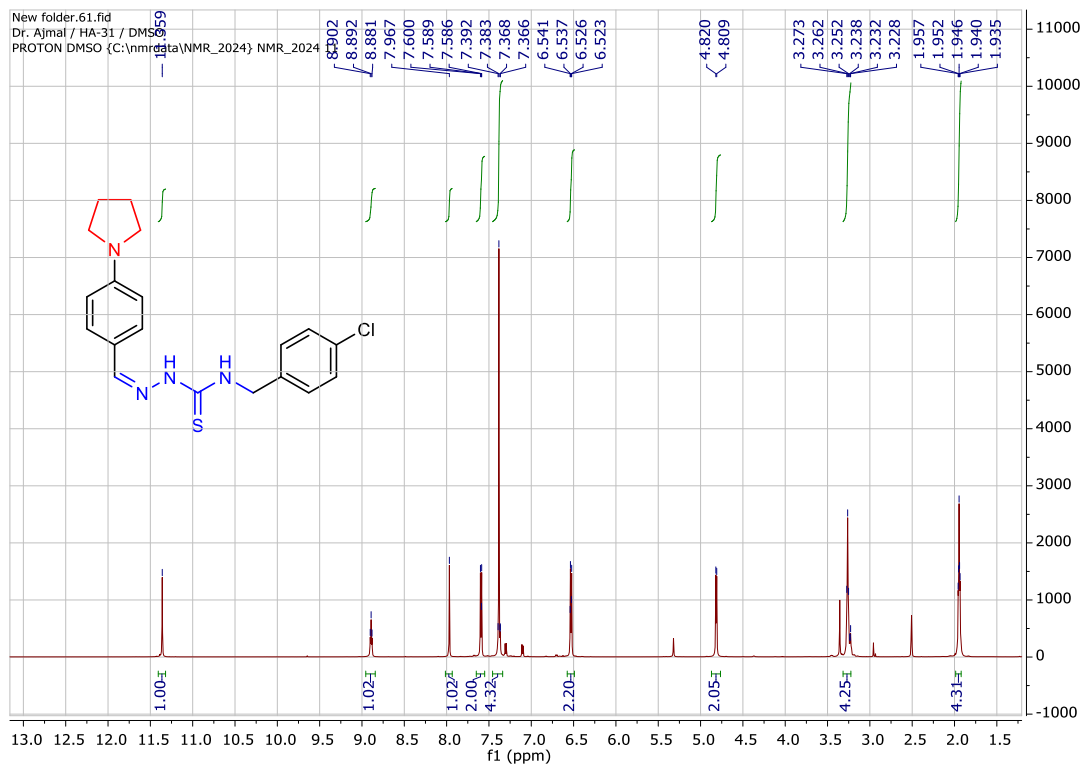

### <sup>13</sup>CNMR, 151 MHz, DMSO-d<sub>6</sub> of 5i

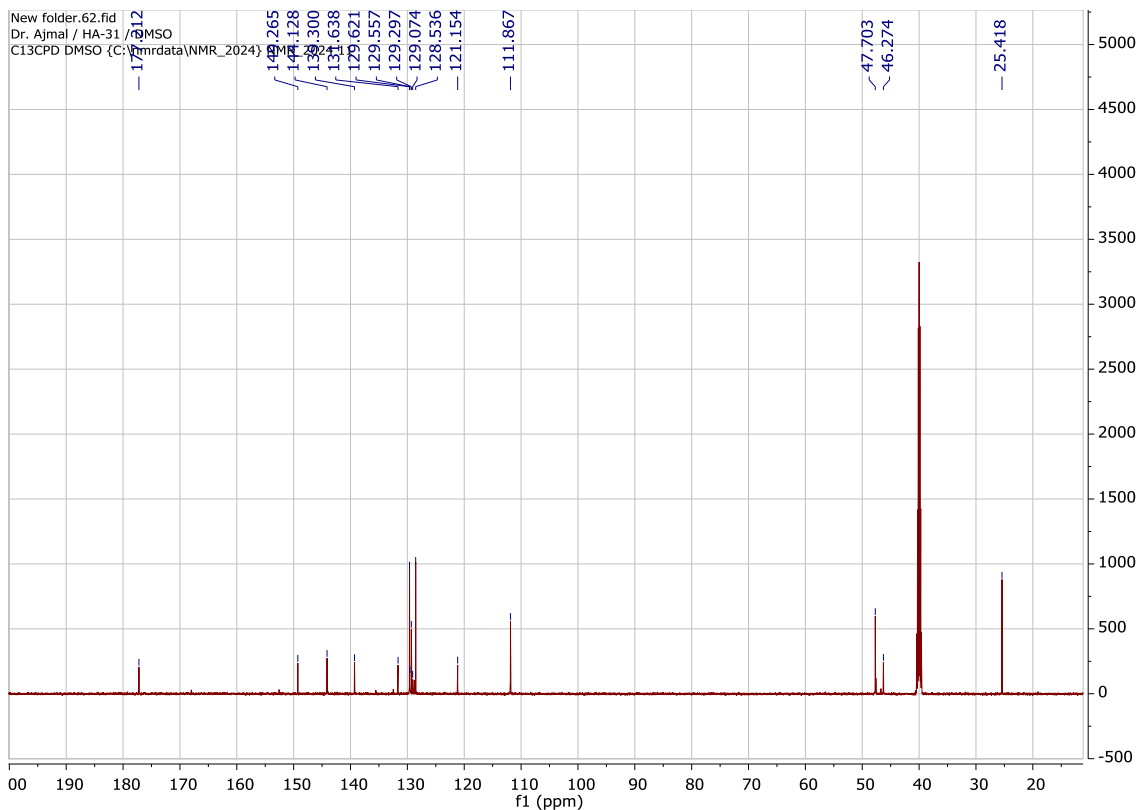

### <sup>1</sup>HNMR, 600 MHz, DMSO-d<sub>6</sub> of 5j

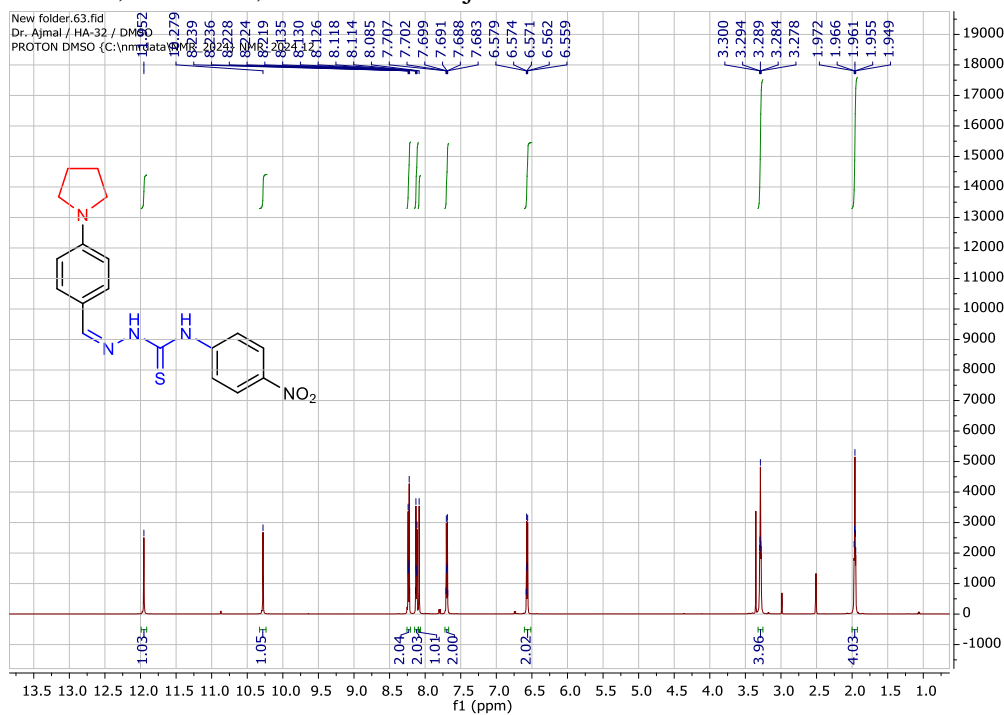

### <sup>13</sup>CNMR, 151 MHz, DMSO-d<sub>6</sub> of 5j

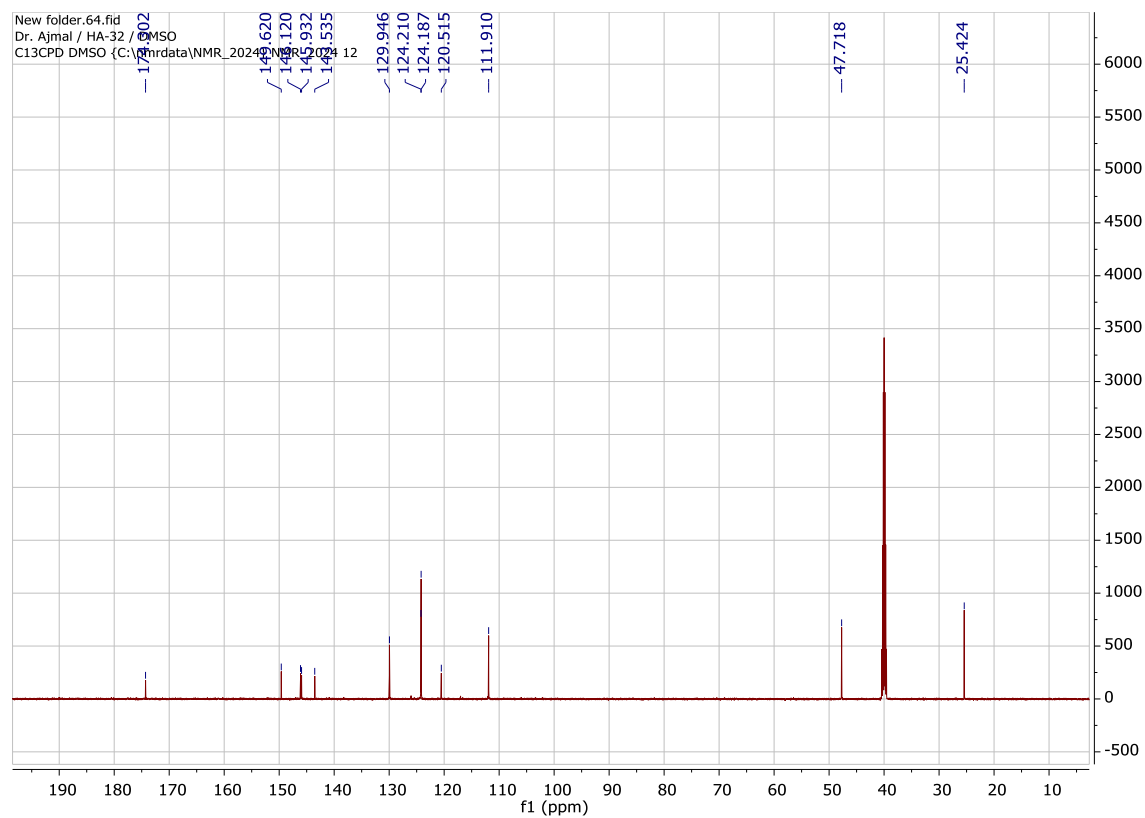

### <sup>1</sup>HNMR, 600 MHz, DMSO-d<sub>6</sub> of 5k

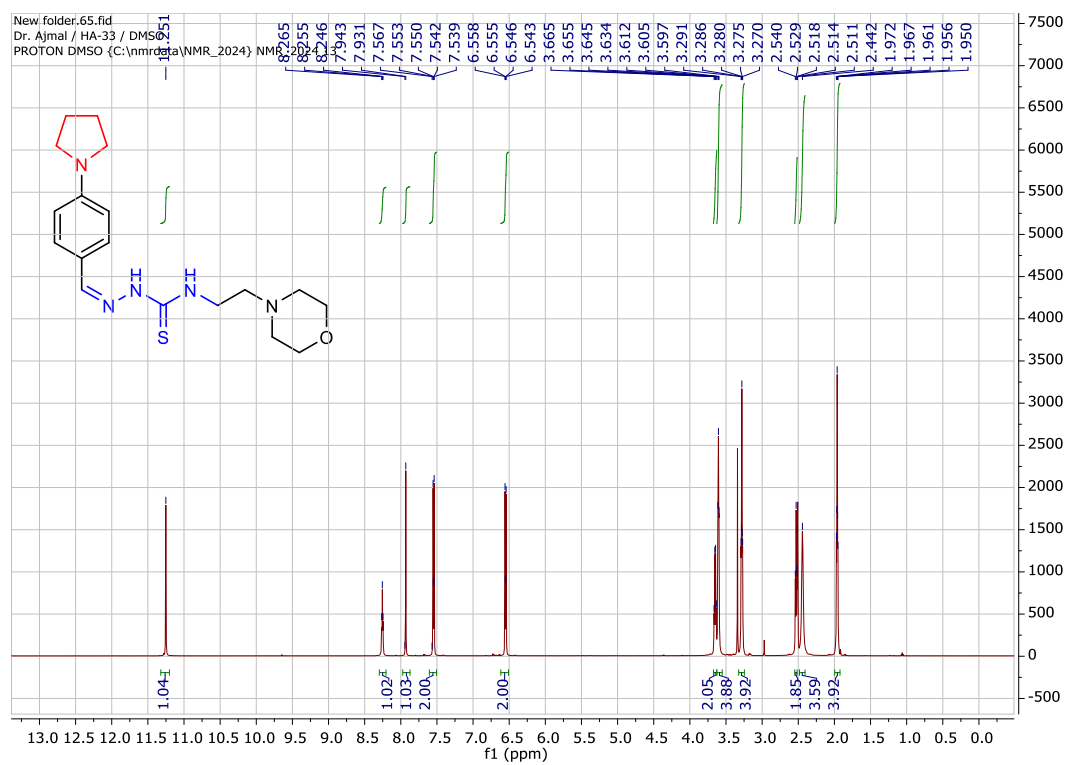

### <sup>13</sup>CNMR, 151 MHz, DMSO-d<sub>6</sub> of 5k

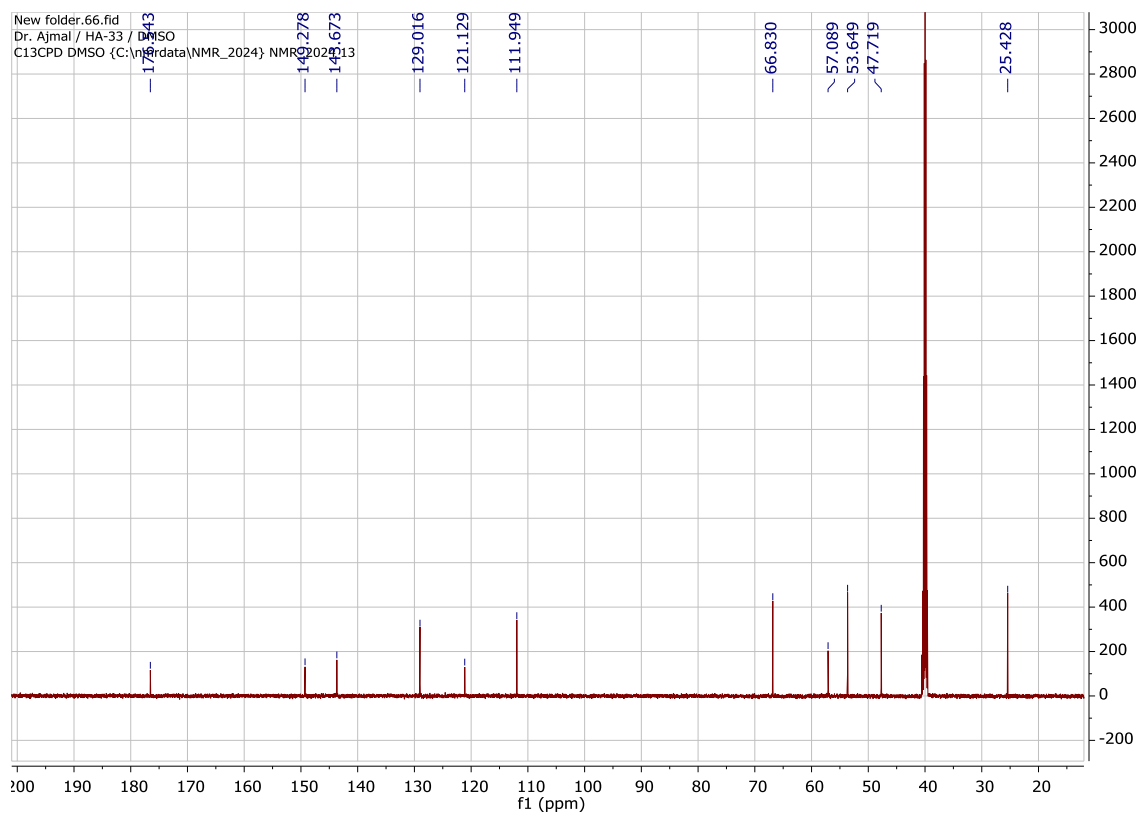

### <sup>1</sup>HNMR, 600 MHz, DMSO-d<sub>6</sub> of 5l

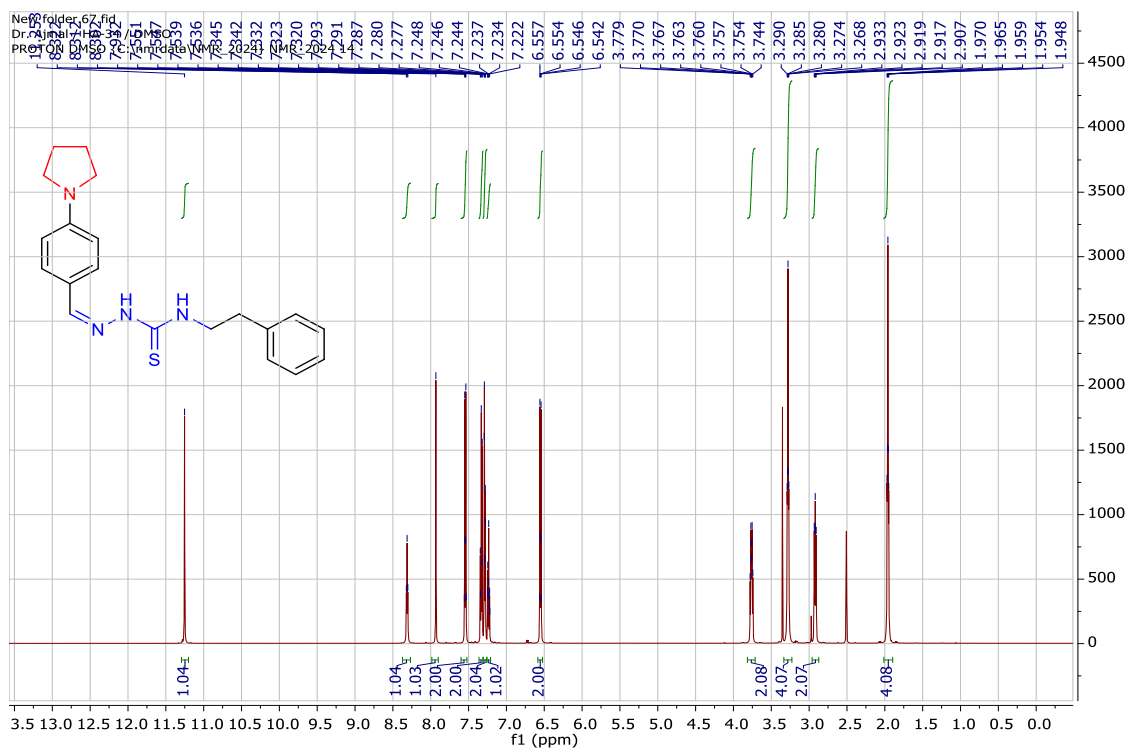

### <sup>13</sup>CNMR, 151 MHz, DMSO-d6 of 51

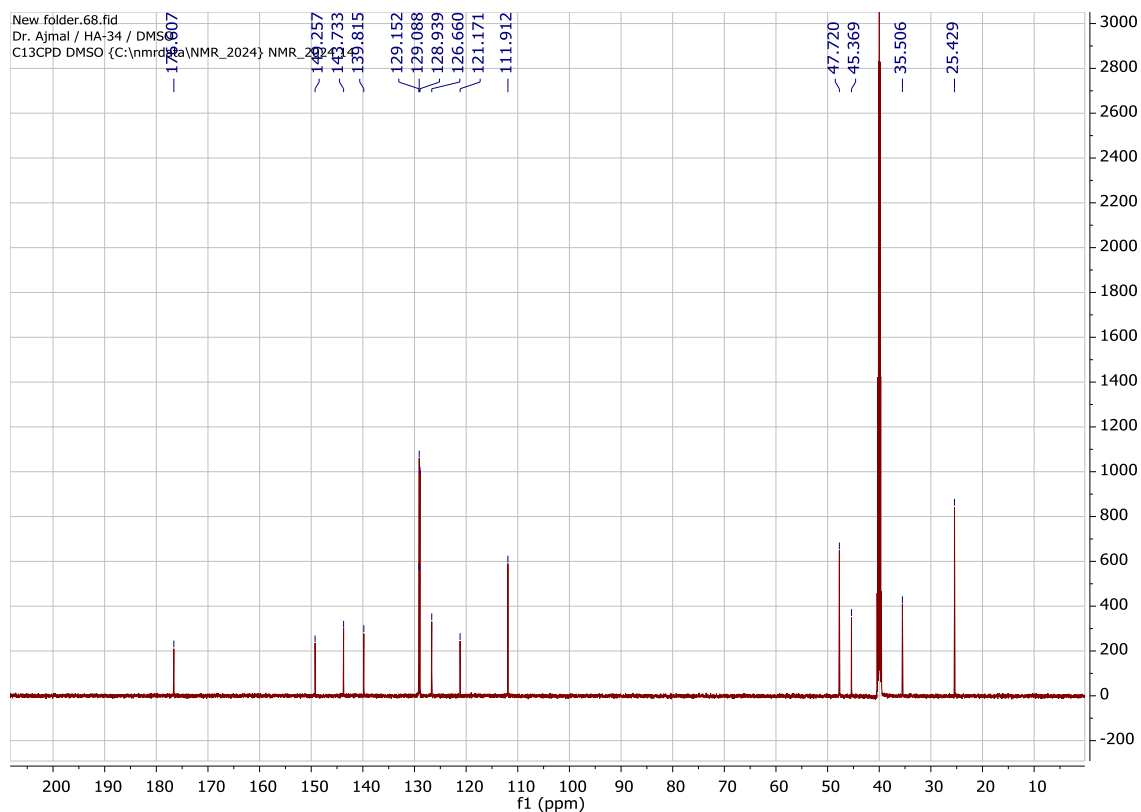

### <sup>1</sup>HNMR, 600 MHz, DMSO-d6 of 5m

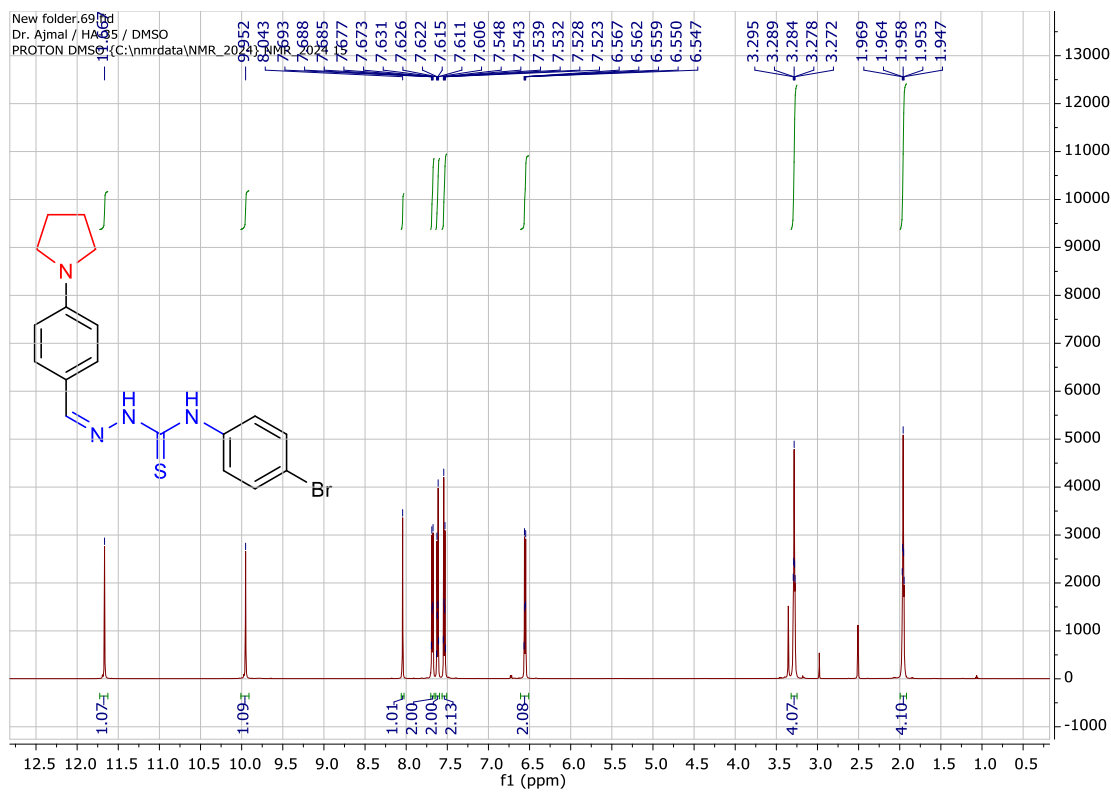

### <sup>13</sup>CNMR, 151 MHz, DMSO-d<sub>6</sub> of 5m

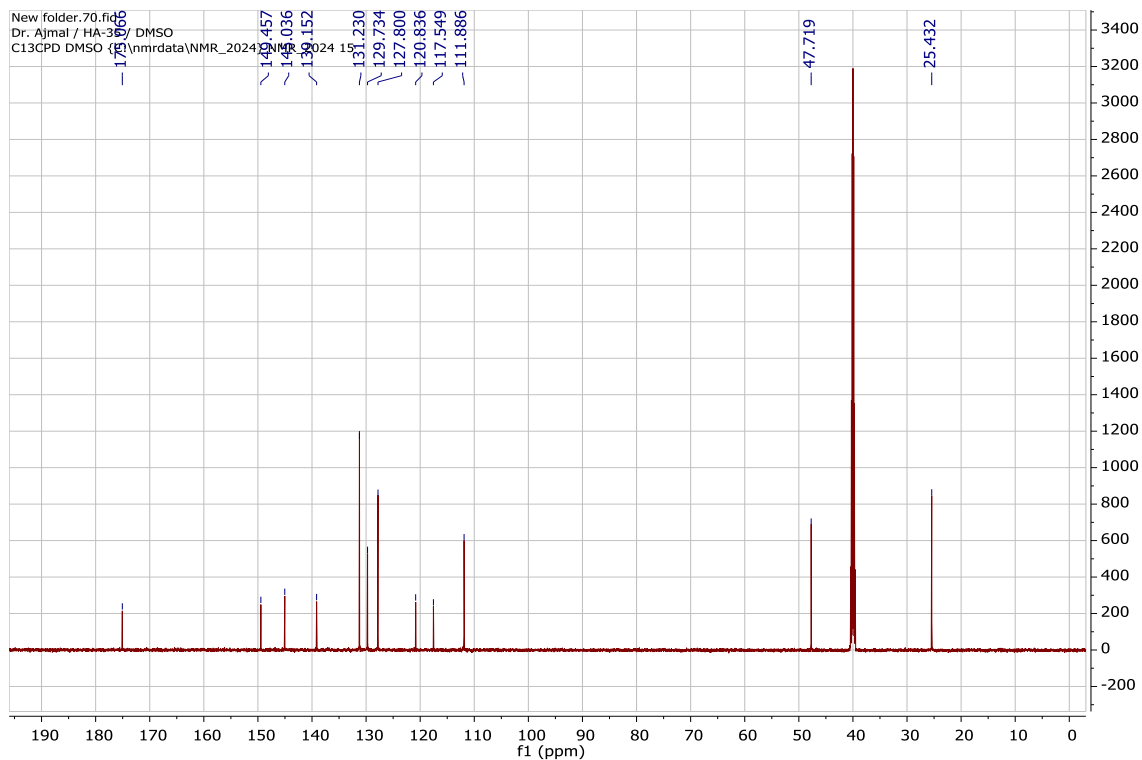

### <sup>1</sup>HNMR, 600 MHz, DMSO-d<sub>6</sub> of 5n

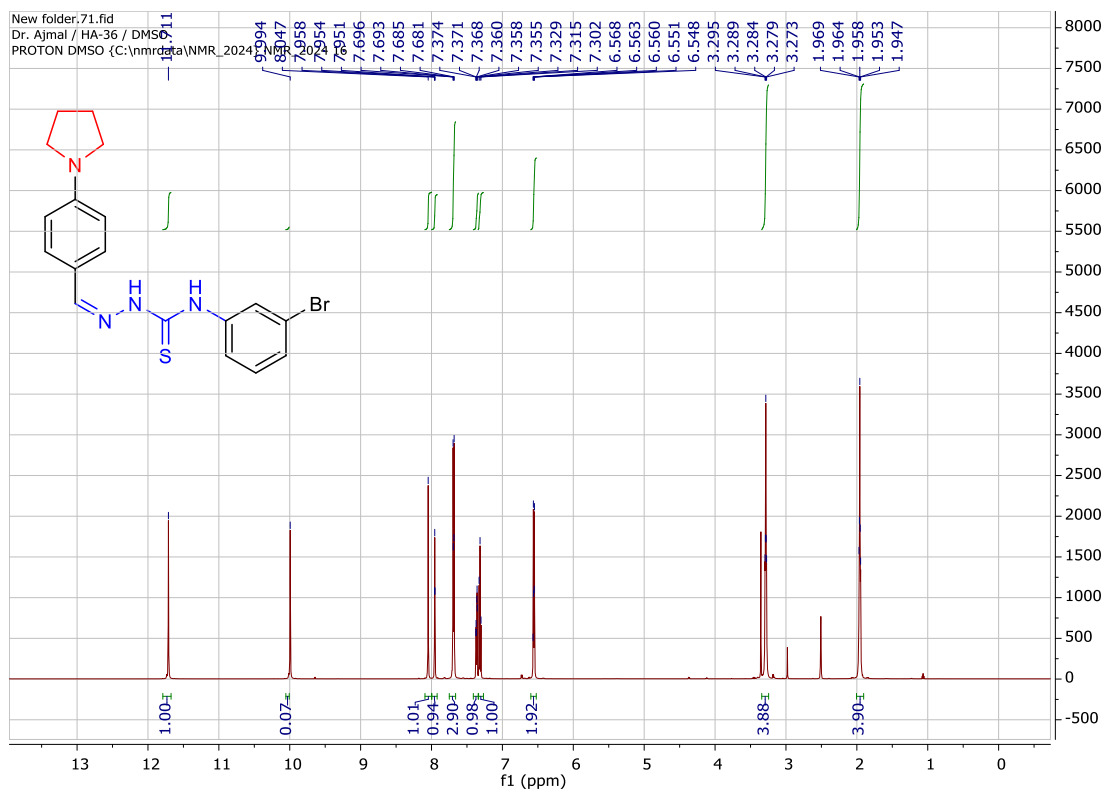

### <sup>13</sup>CNMR, 151 MHz, DMSO-d<sub>6</sub> of 5n

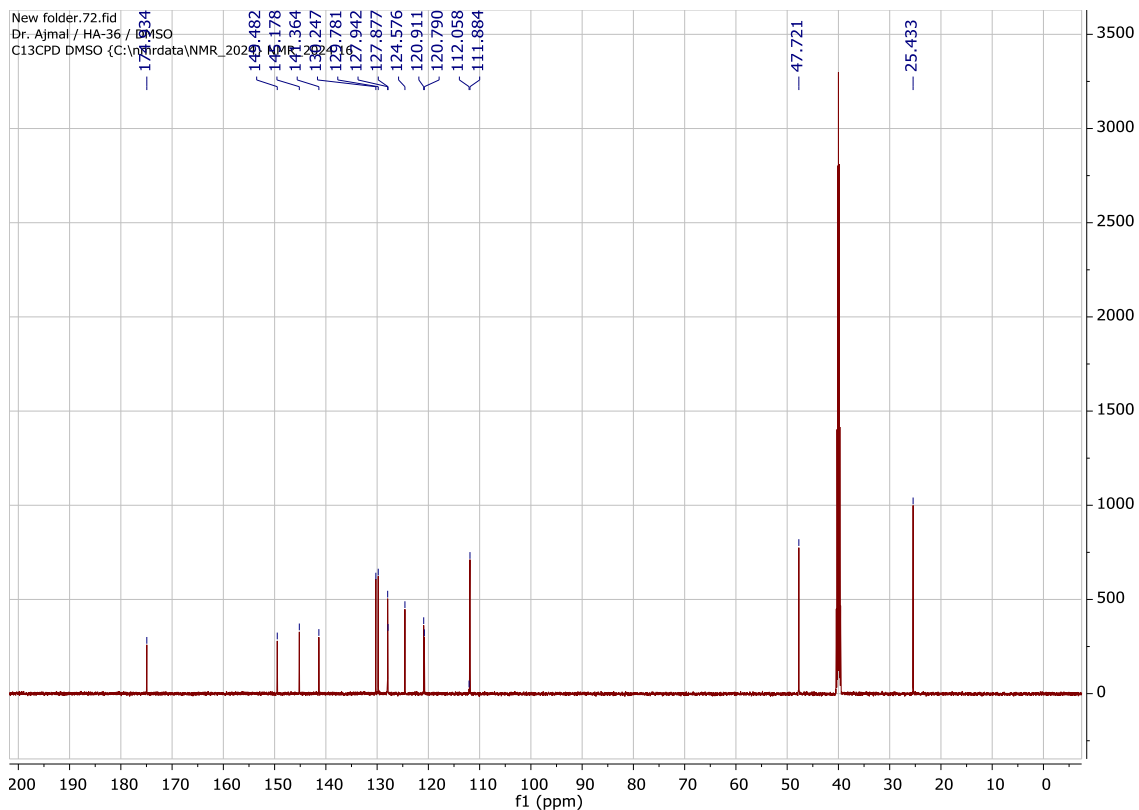

### <sup>1</sup>HNMR, 600 MHz, DMSO-d<sub>6</sub> of 5o

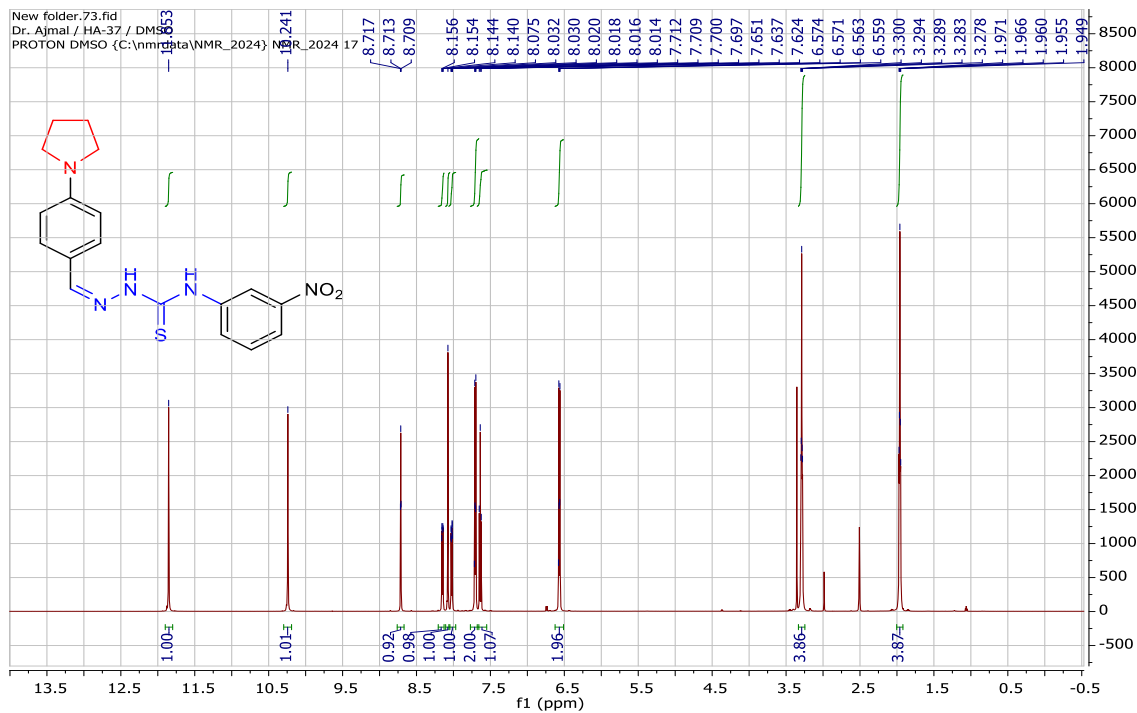



**<sup>13</sup>CNMR, 151 MHz, DMSO-d<sub>6</sub> of 5o**

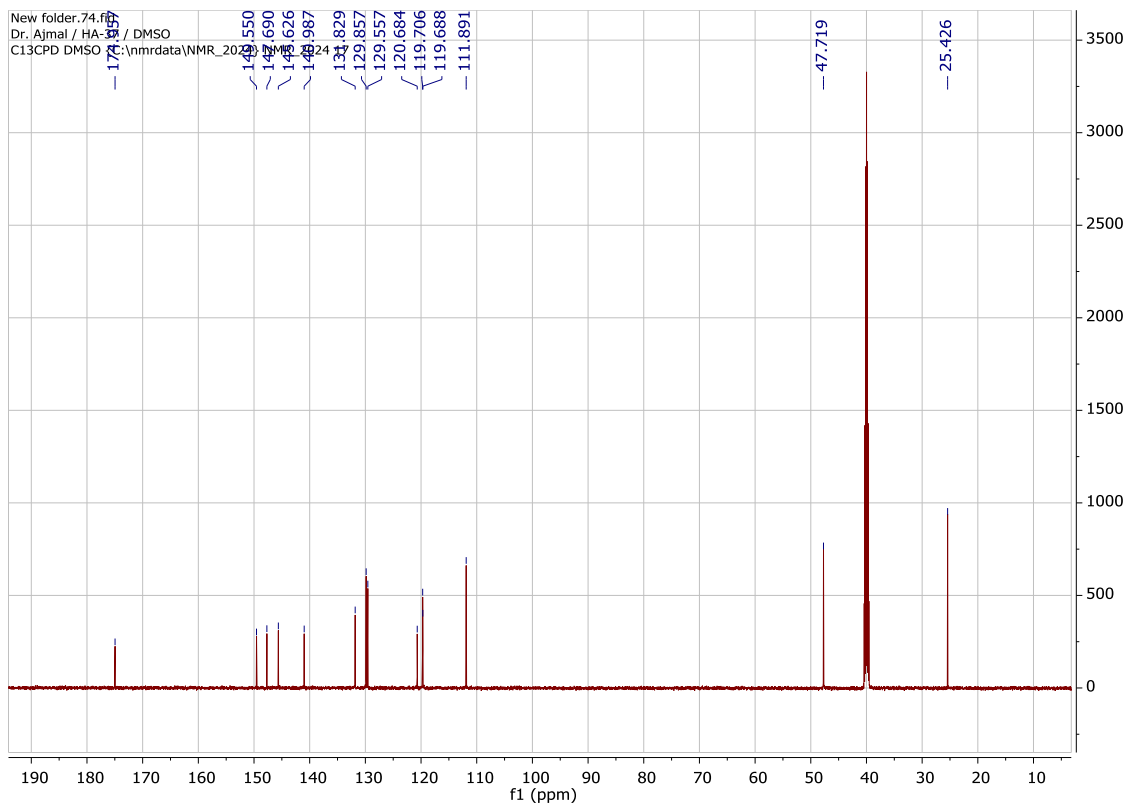

**<sup>1</sup>HNMR, 600 MHz, DMSO-d<sub>6</sub> of 5p**

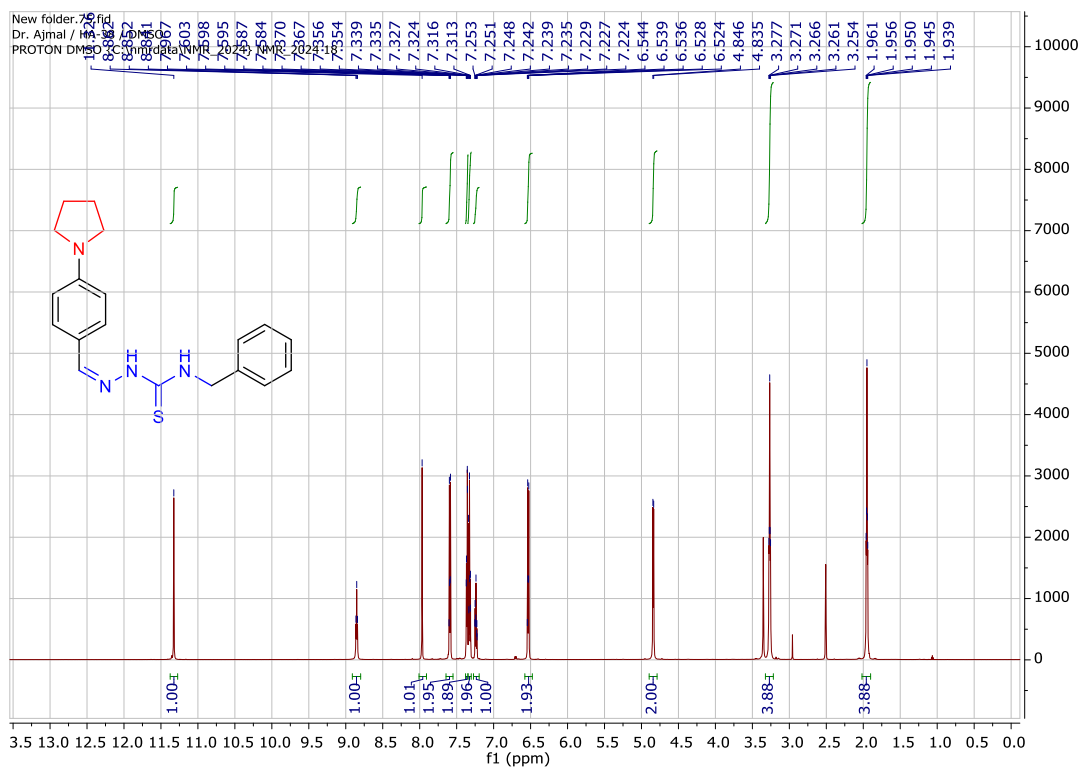

### <sup>13</sup>CNMR, 151 MHz, DMSO-d<sub>6</sub> of 5p

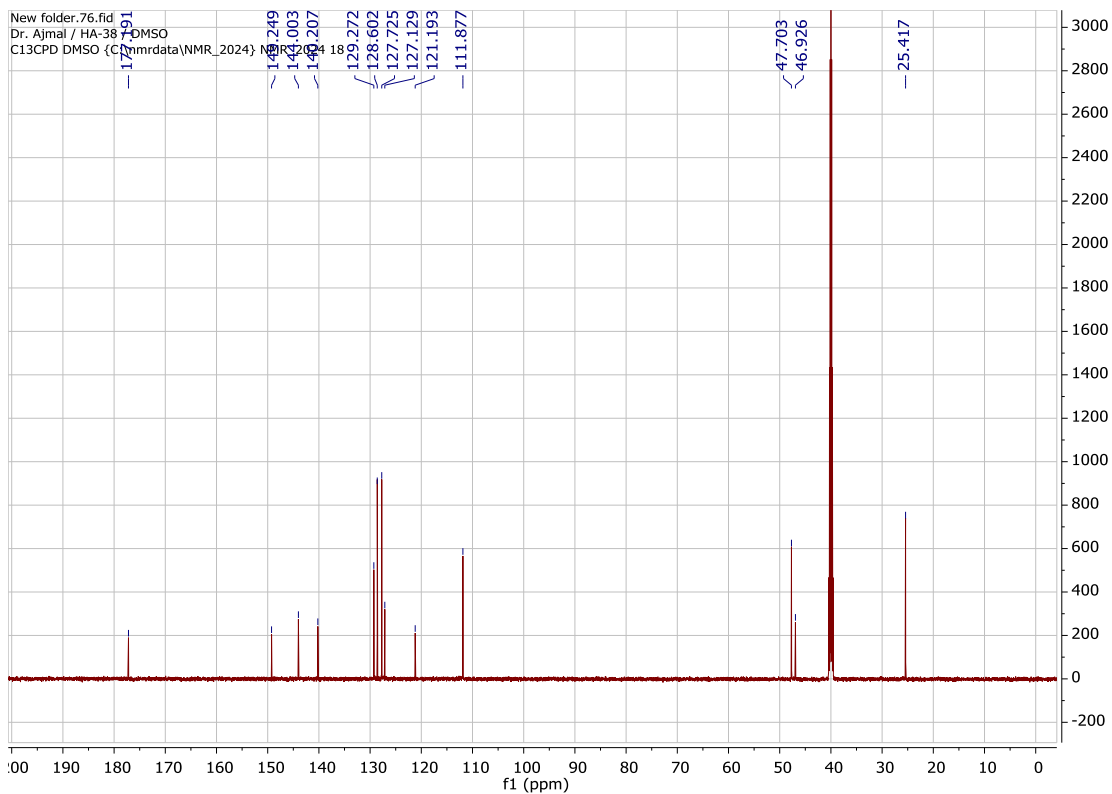

### <sup>1</sup>HNMR, 600 MHz, DMSO-d<sub>6</sub> of 5q

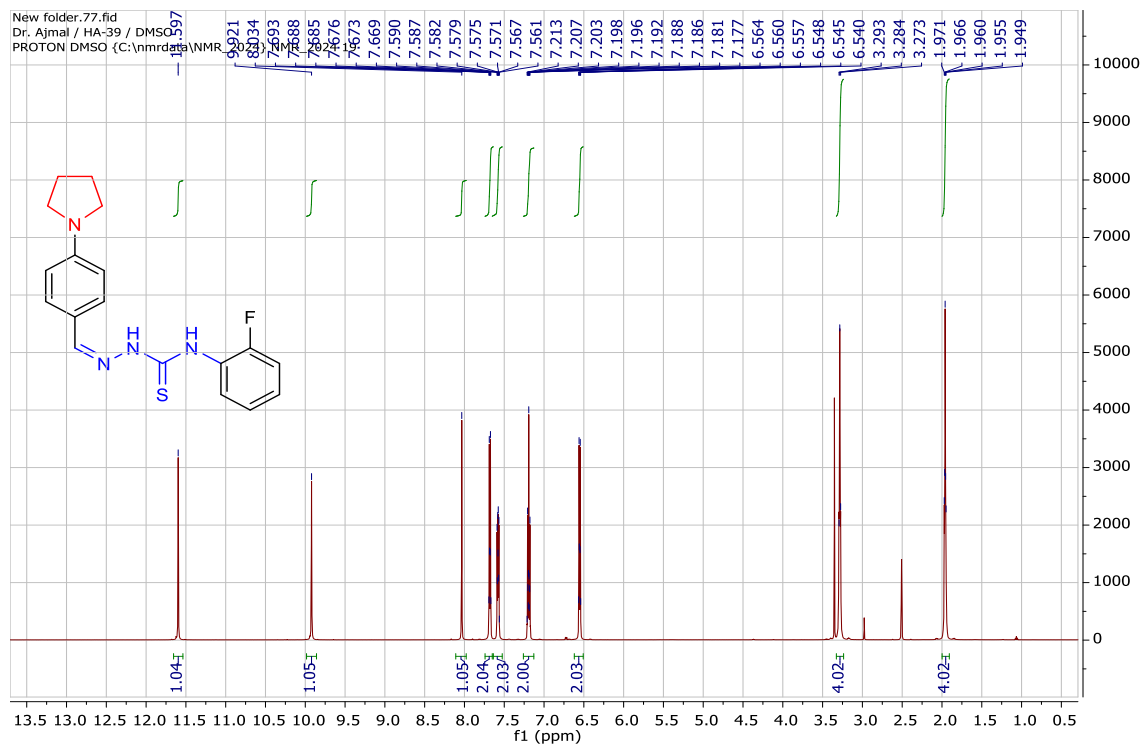

### <sup>13</sup>CNMR, 151 MHz, DMSO-d<sub>6</sub> of 5q

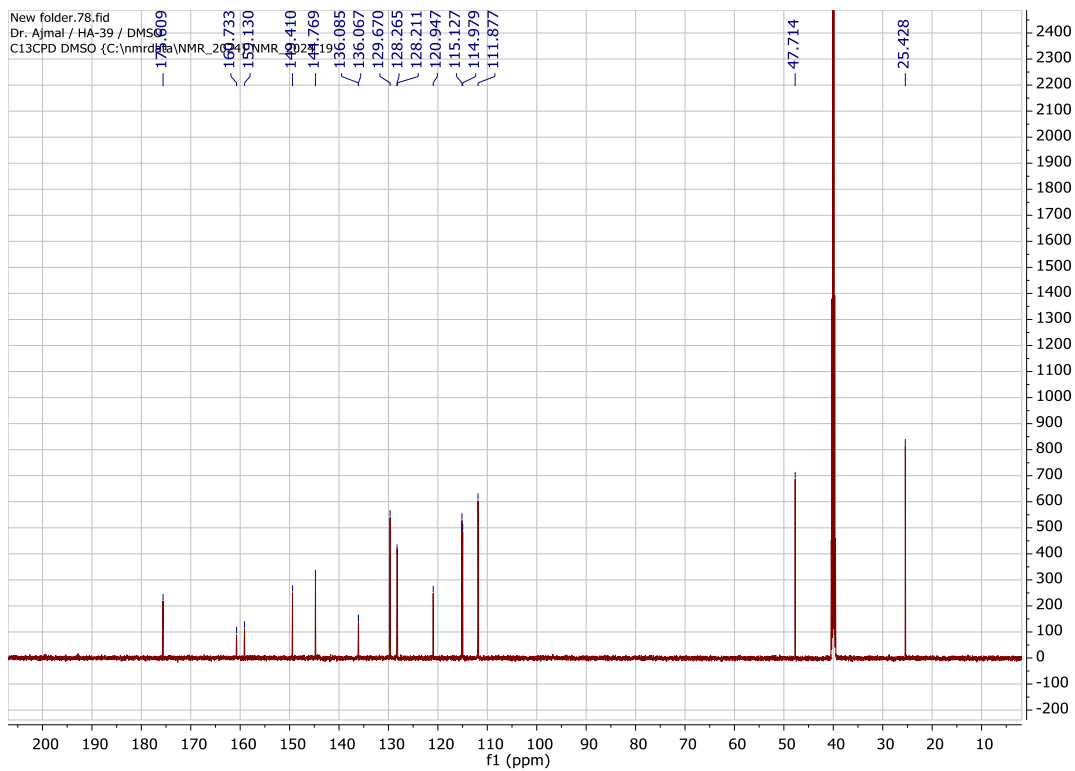

### <sup>1</sup>HNMR, 600 MHz, DMSO-d<sub>6</sub> of 5r

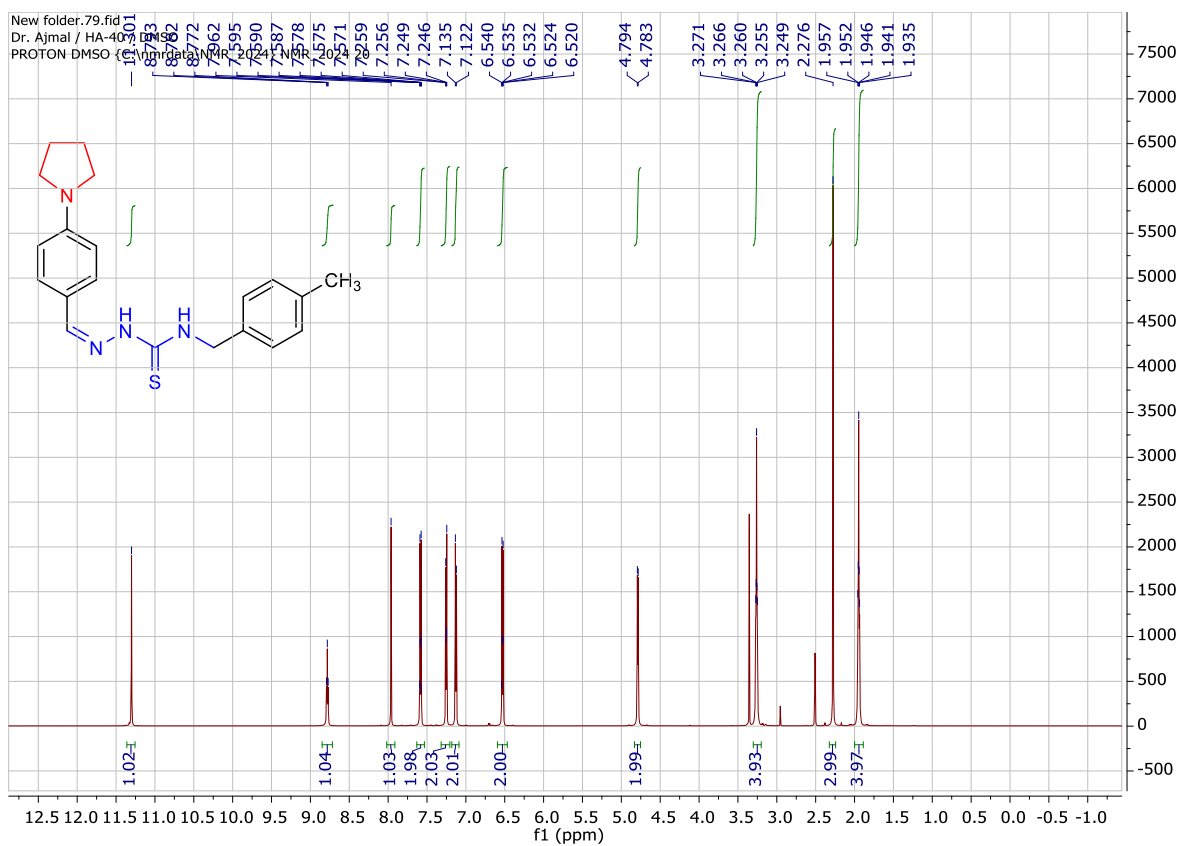

$^{13}\text{C}$ NMR, 151 MHz, DMSO- $d_6$  of 5r

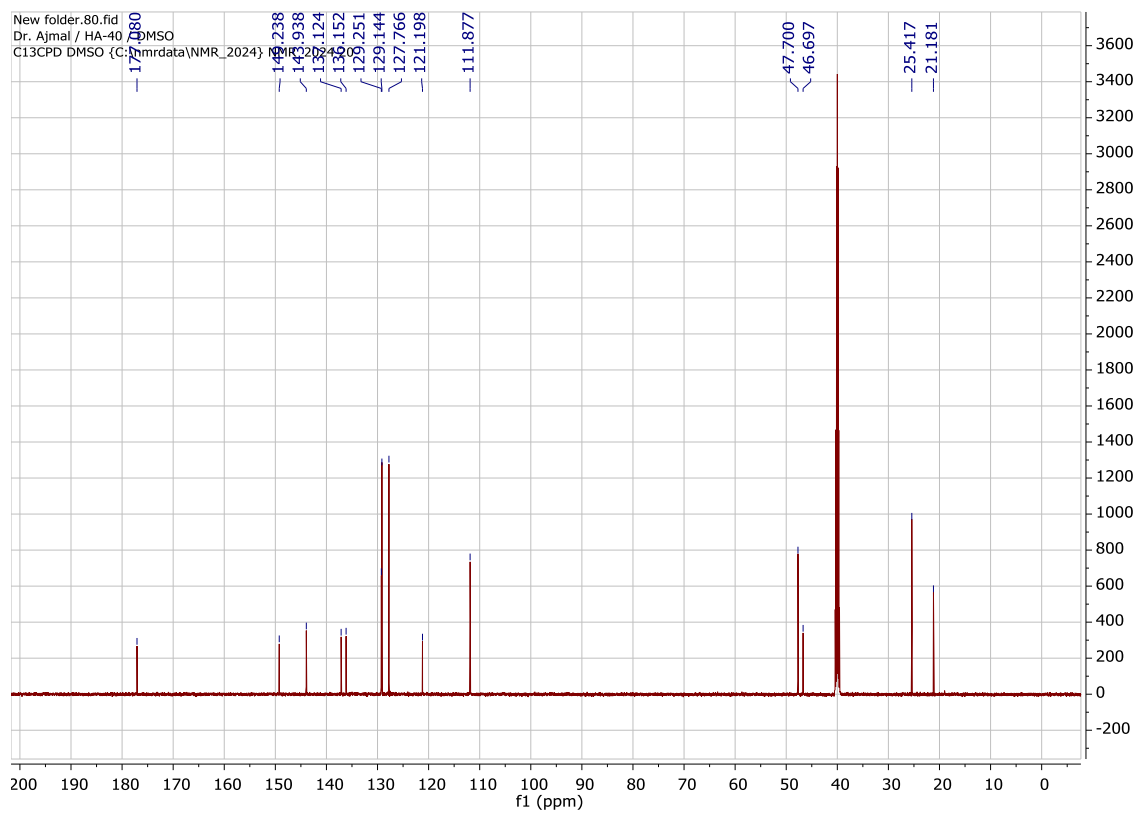

HRMS of synthesized compounds 5(a-r)

5a

### Spectrum Plot Report

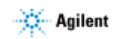

|              |         |                   |            |              |                                  |
|--------------|---------|-------------------|------------|--------------|----------------------------------|
| Sample Name  | HA-21   | Rack Position     | Instrument | Instrument 1 | Acq Operator                     |
| Inj Vol (ul) | 10      | Plate Position    | IRM Status | Success      |                                  |
| Data File    | HA-21.d | Acq Method        | Comment    |              |                                  |
|              |         | APCI POS ION DMSO |            |              | Acq Time (Local)                 |
|              |         | MS.m              |            |              | 21-May-24 3:17:21 PM (UTC+04:00) |

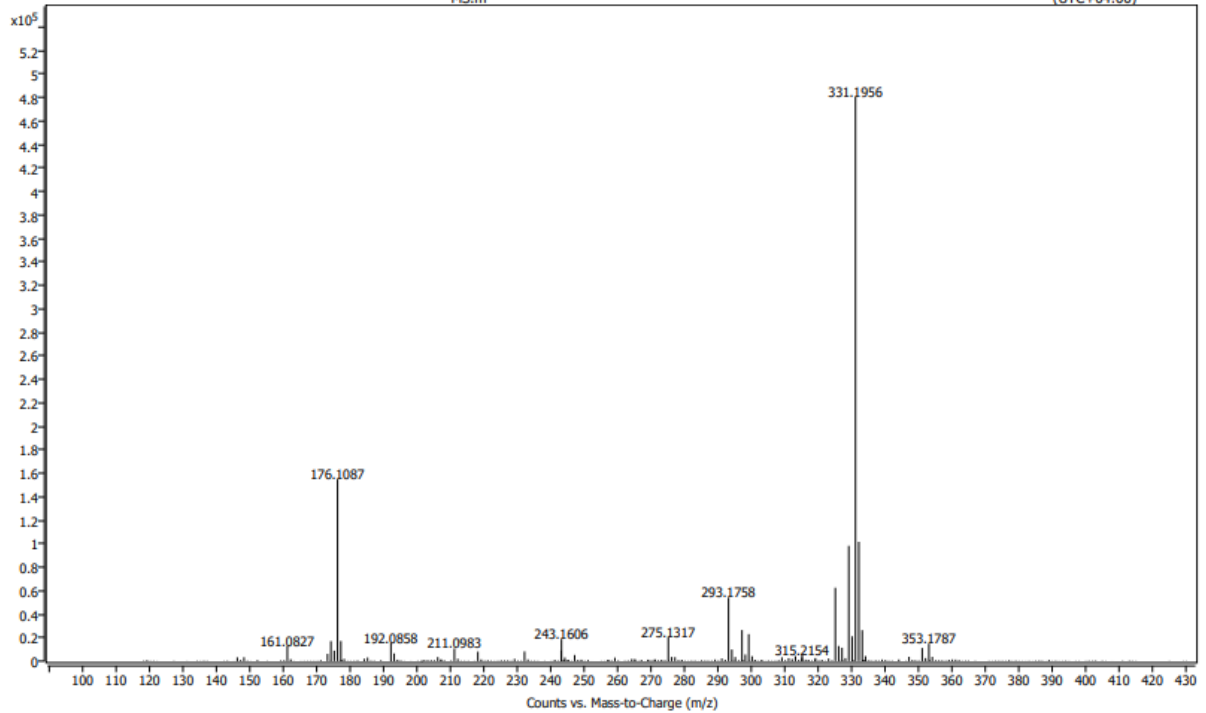

5b

### Spectrum Plot Report

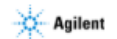

|              |        |                   |            |              |                                  |
|--------------|--------|-------------------|------------|--------------|----------------------------------|
| Sample Name  | HA-2   | Rack Position     | Instrument | Instrument 1 | Acq Operator                     |
| Inj Vol (ul) | 10     | Plate Position    | IRM Status | Success      |                                  |
| Data File    | HA-2.d | Acq Method        | Comment    |              |                                  |
|              |        | APCI POS ION DMSO |            |              | Acq Time (Local)                 |
|              |        | MS.m              |            |              | 21-May-24 9:42:27 AM (UTC+04:00) |

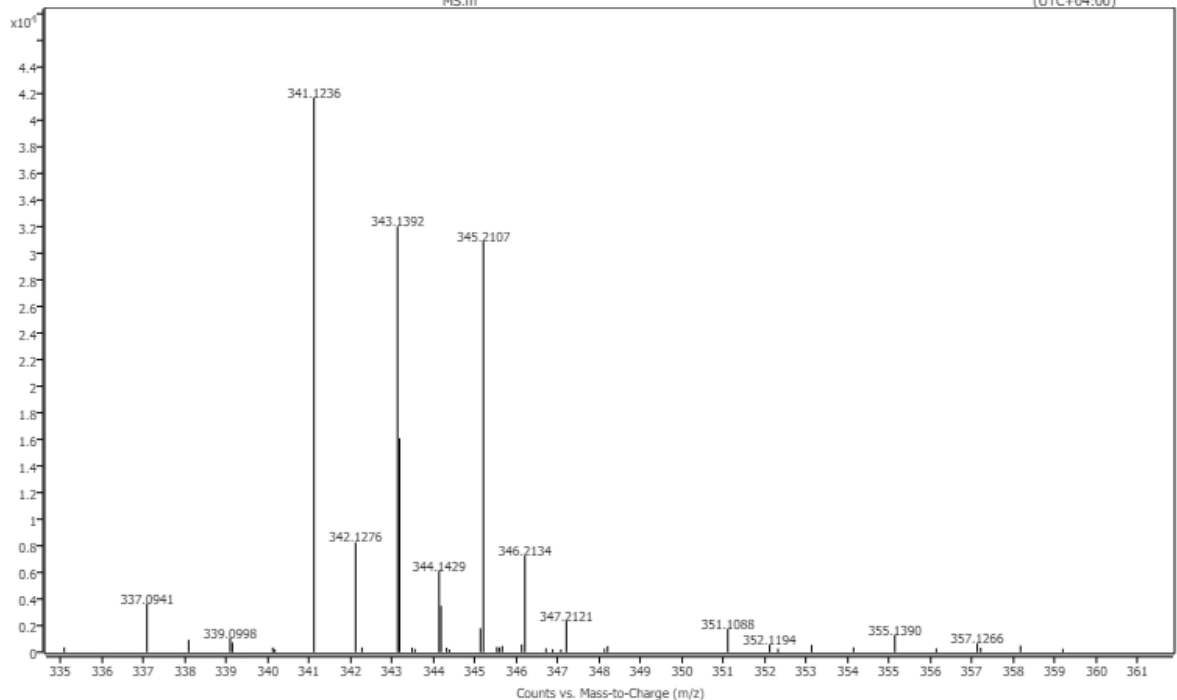

5c

### Spectrum Plot Report

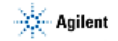

|              |         |                   |            |              |                      |
|--------------|---------|-------------------|------------|--------------|----------------------|
| Sample Name  | HA-23   | Rack Position     | Instrument | Instrument 1 | Acq Operator         |
| Inj Vol (ul) | 10      | Plate Position    | IRM Status | Success      |                      |
| Data File    | HA-23.d | Acq Method        | Comment    |              | Acq Time (Local)     |
|              |         | APCI POS ION DMSO |            |              | 21-May-24 3:28:12 PM |
|              |         | MS.m              |            |              | (UTC+04:00)          |

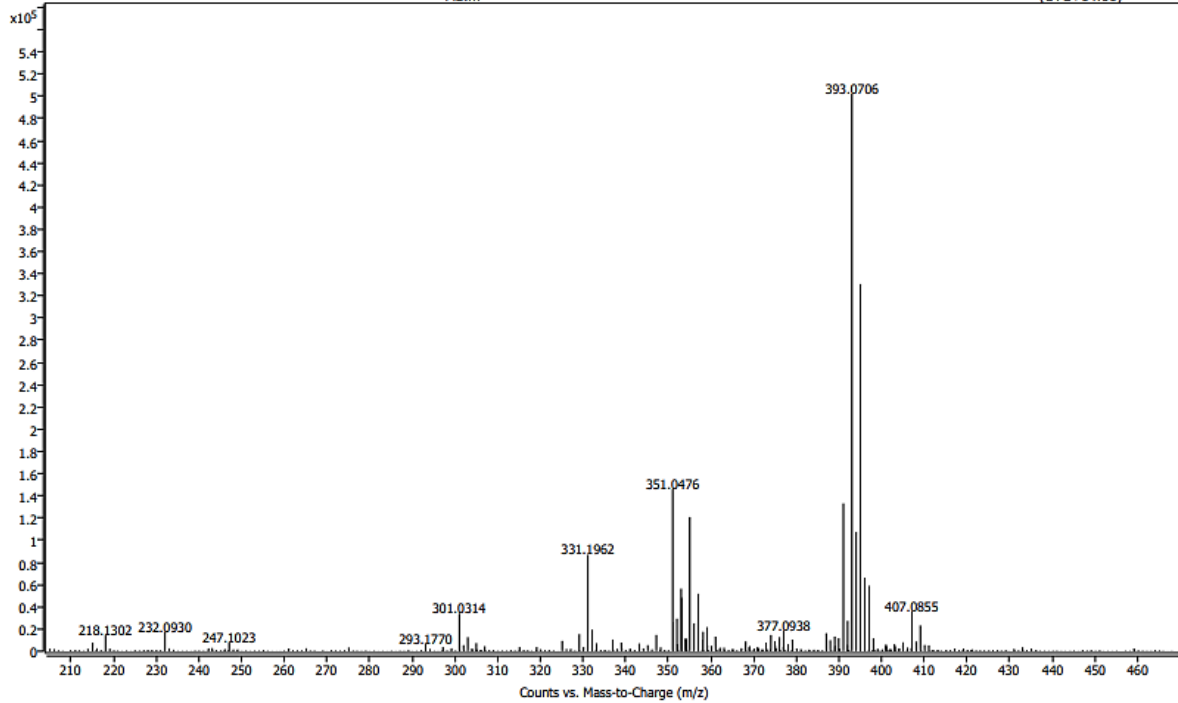

5d

### Spectrum Plot Report

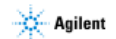

|              |         |                   |            |              |                      |
|--------------|---------|-------------------|------------|--------------|----------------------|
| Sample Name  | HA-25   | Rack Position     | Instrument | Instrument 1 | Acq Operator         |
| Inj Vol (ul) | 10      | Plate Position    | IRM Status | Success      |                      |
| Data File    | HA-25.d | Acq Method        | Comment    |              | Acq Time (Local)     |
|              |         | APCI POS ION DMSO |            |              | 21-May-24 3:39:07 PM |
|              |         | MS.m              |            |              | (UTC+04:00)          |

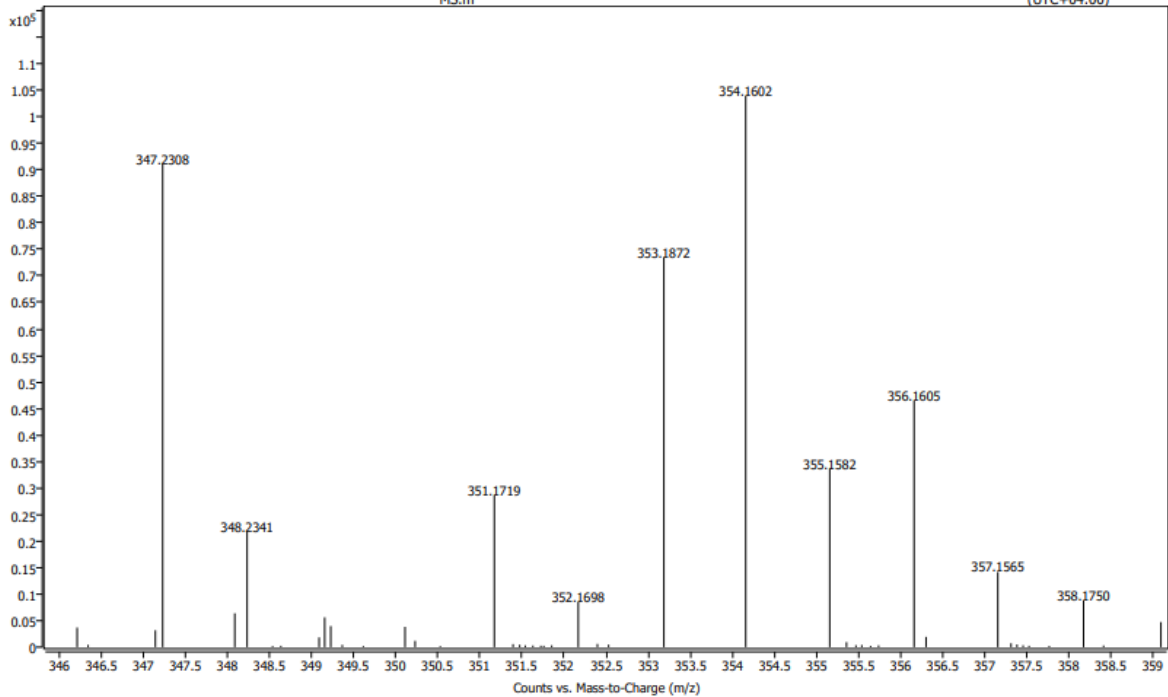

5e

### Spectrum Plot Report

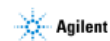

|              |         |                |                        |              |                                                   |
|--------------|---------|----------------|------------------------|--------------|---------------------------------------------------|
| Sample Name  | HA-26   | Rack Position  | Instrument             | Instrument 1 | Acq Operator                                      |
| Inj Vol (ul) | 10      | Plate Position | IRM Status             | Success      |                                                   |
| Data File    | HA-26.d | Acq Method     | APCI POS ION DMSO MS.m | Comment      | Acq Time (Local) 21-May-24 3:44:30 PM (UTC+04:00) |

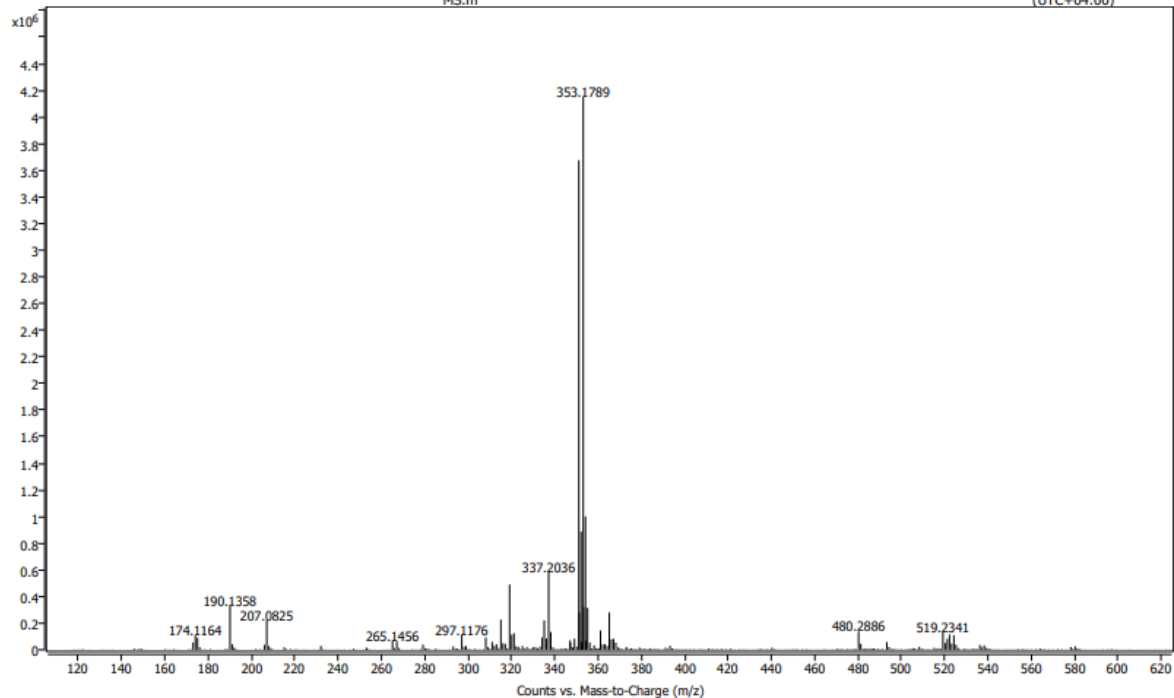

5f

### Spectrum Plot Report

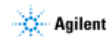

|              |         |                |                        |              |                                                   |
|--------------|---------|----------------|------------------------|--------------|---------------------------------------------------|
| Sample Name  | HA-27   | Rack Position  | Instrument             | Instrument 1 | Acq Operator                                      |
| Inj Vol (ul) | 10      | Plate Position | IRM Status             | Success      |                                                   |
| Data File    | HA-27.d | Acq Method     | APCI POS ION DMSO MS.m | Comment      | Acq Time (Local) 21-May-24 3:49:53 PM (UTC+04:00) |

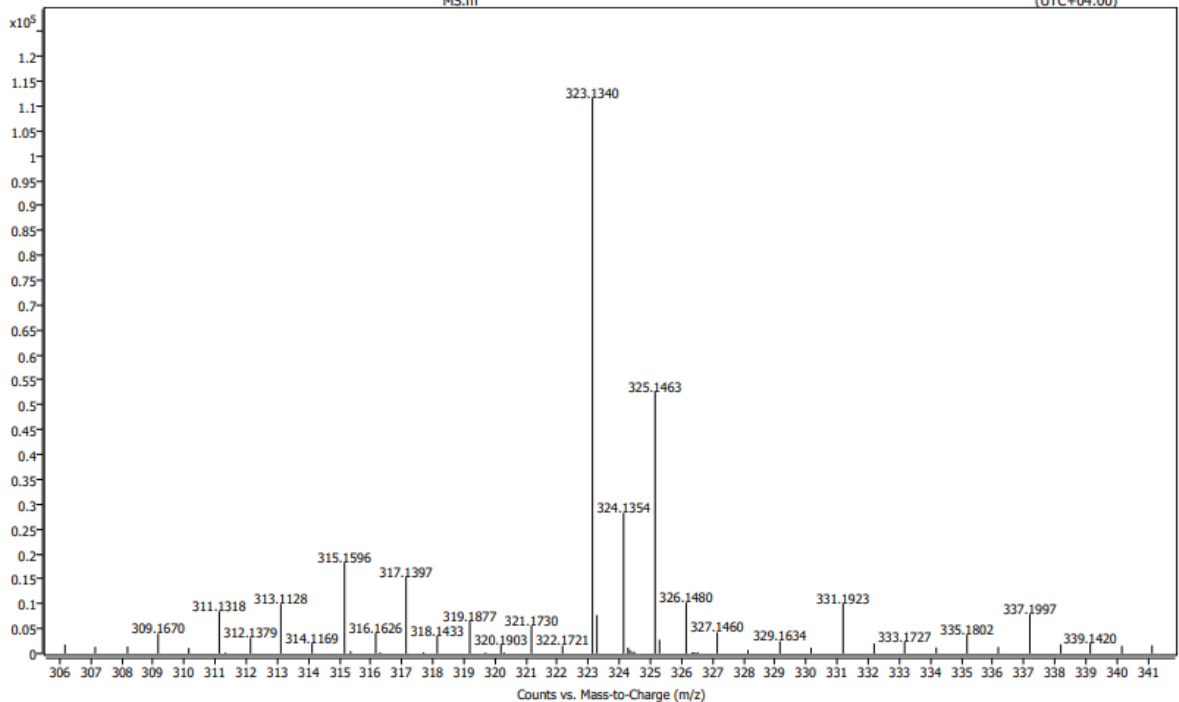

5g

### Spectrum Plot Report

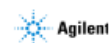

|              |         |                   |            |              |                      |
|--------------|---------|-------------------|------------|--------------|----------------------|
| Sample Name  | HA-29   | Rack Position     | Instrument | Instrument 1 | Acq Operator         |
| Inj Vol (ul) | 10      | Plate Position    | IRM Status | Success      |                      |
| Data File    | HA-29.d | Acq Method        | Comment    |              | Acq Time (Local)     |
|              |         | APCI POS ION DMSO |            |              | 21-May-24 4:00:42 PM |
|              |         | MS.m              |            |              | (UTC+04:00)          |

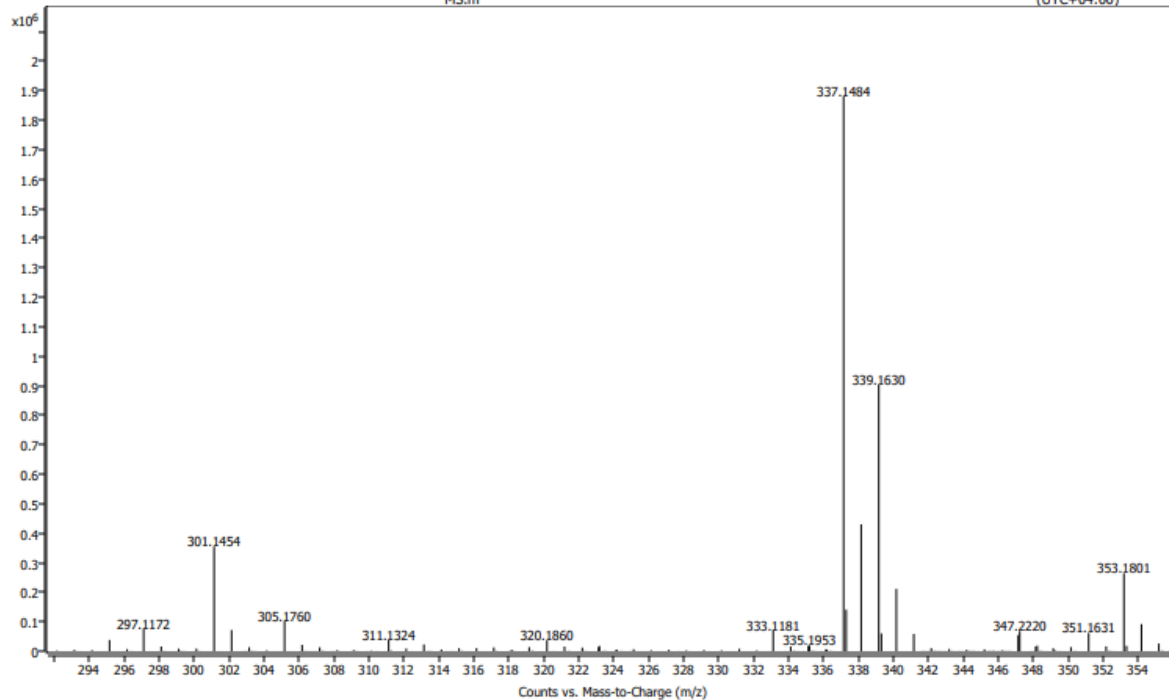

5h

### Spectrum Plot Report

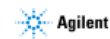

|              |         |                   |            |              |                      |
|--------------|---------|-------------------|------------|--------------|----------------------|
| Sample Name  | HA-30   | Rack Position     | Instrument | Instrument 1 | Acq Operator         |
| Inj Vol (ul) | 10      | Plate Position    | IRM Status | Success      |                      |
| Data File    | HA-30.d | Acq Method        | Comment    |              | Acq Time (Local)     |
|              |         | APCI POS ION DMSO |            |              | 21-May-24 4:06:16 PM |
|              |         | MS.m              |            |              | (UTC+04:00)          |

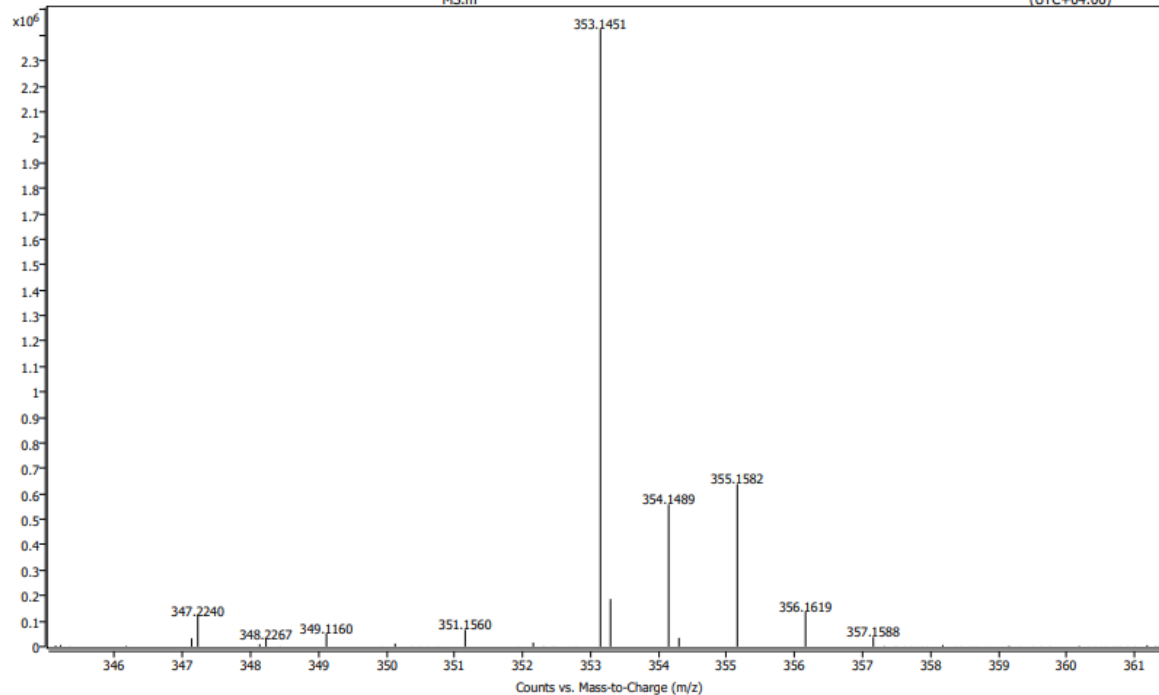



5i

### Spectrum Plot Report

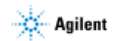

|              |         |                |                        |            |              |                  |                                  |
|--------------|---------|----------------|------------------------|------------|--------------|------------------|----------------------------------|
| Sample Name  | HA-31   | Rack Position  |                        | Instrument | Instrument 1 | Acq Operator     |                                  |
| Inj Vol (ul) | 10      | Plate Position |                        | IRM Status | Success      |                  |                                  |
| Data File    | HA-31.d | Acq Method     | APCI POS ION DMSO MS.m | Comment    |              | Acq Time (Local) | 21-May-24 2:08:15 PM (UTC+04:00) |

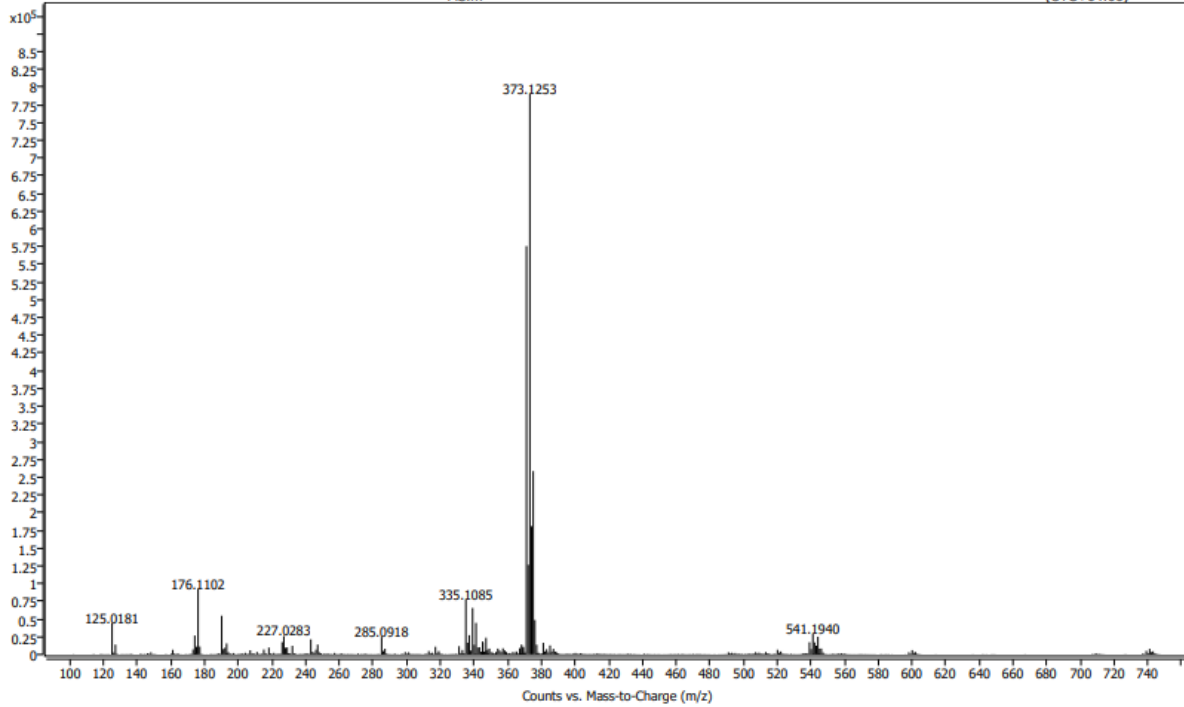

5j

### Spectrum Plot Report

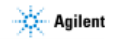

|              |         |                |                        |            |              |                  |                                  |
|--------------|---------|----------------|------------------------|------------|--------------|------------------|----------------------------------|
| Sample Name  | HA-32   | Rack Position  |                        | Instrument | Instrument 1 | Acq Operator     |                                  |
| Inj Vol (ul) | 10      | Plate Position |                        | IRM Status | Success      |                  |                                  |
| Data File    | HA-32.d | Acq Method     | APCI POS ION DMSO MS.m | Comment    |              | Acq Time (Local) | 21-May-24 2:13:42 PM (UTC+04:00) |

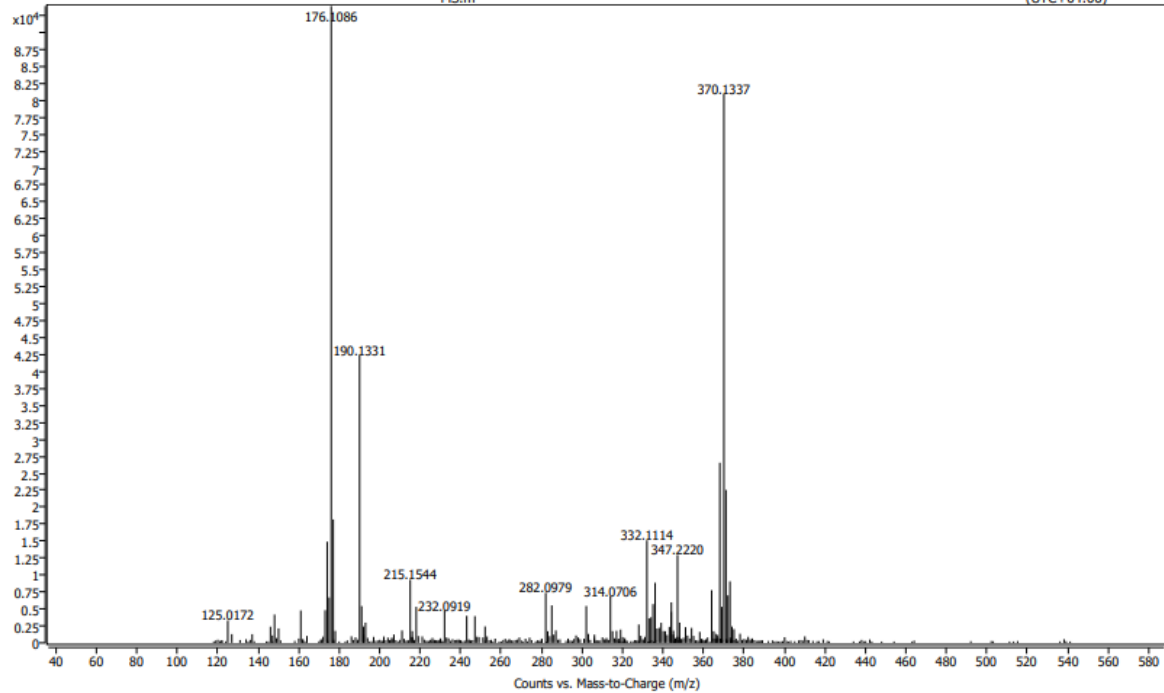

5k

### Spectrum Plot Report

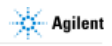

|              |         |                |                        |            |              |                  |                                  |
|--------------|---------|----------------|------------------------|------------|--------------|------------------|----------------------------------|
| Sample Name  | HA-33   | Rack Position  |                        | Instrument | Instrument 1 | Acq Operator     |                                  |
| Inj Vol (ul) | 10      | Plate Position |                        | IRM Status | Success      |                  |                                  |
| Data File    | HA-33.d | Acq Method     | APCI POS ION DMSO MS.m | Comment    |              | Acq Time (Local) | 21-May-24 2:19:15 PM (UTC+04:00) |

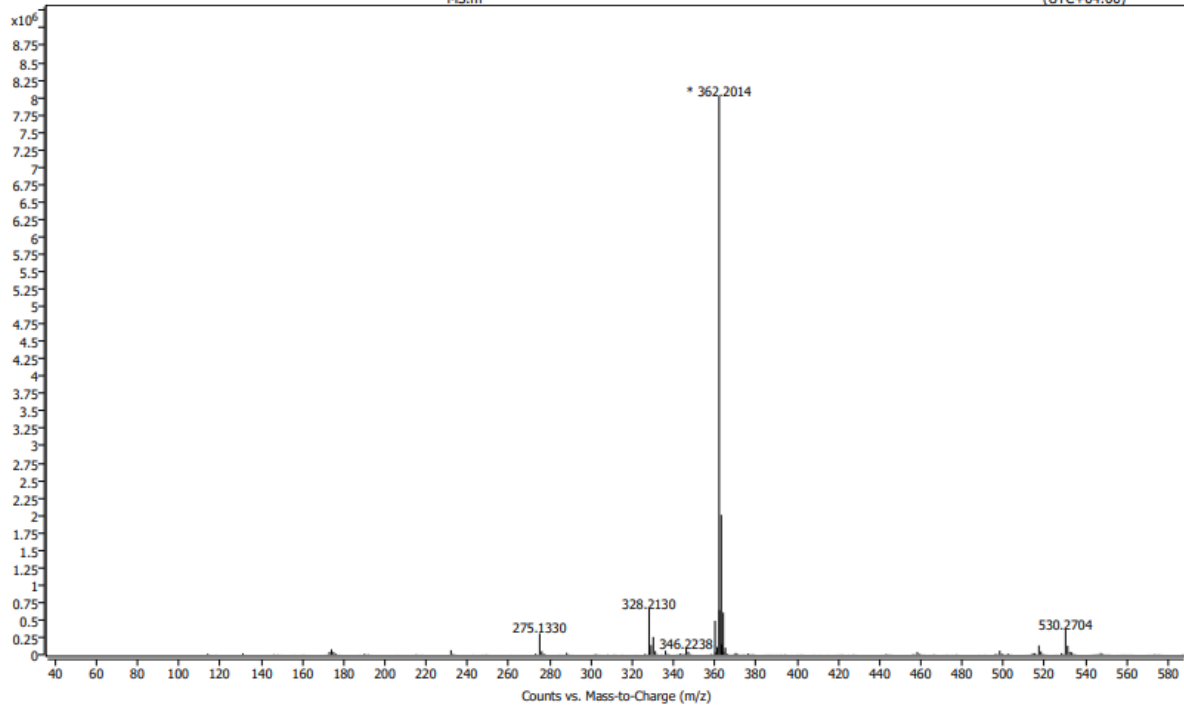

5l

### Spectrum Plot Report

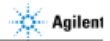

|              |         |                |                        |            |              |                  |                                  |
|--------------|---------|----------------|------------------------|------------|--------------|------------------|----------------------------------|
| Sample Name  | HA-34   | Rack Position  |                        | Instrument | Instrument 1 | Acq Operator     |                                  |
| Inj Vol (ul) | 10      | Plate Position |                        | IRM Status | Success      |                  |                                  |
| Data File    | HA-34.d | Acq Method     | APCI POS ION DMSO MS.m | Comment    |              | Acq Time (Local) | 21-May-24 2:24:38 PM (UTC+04:00) |

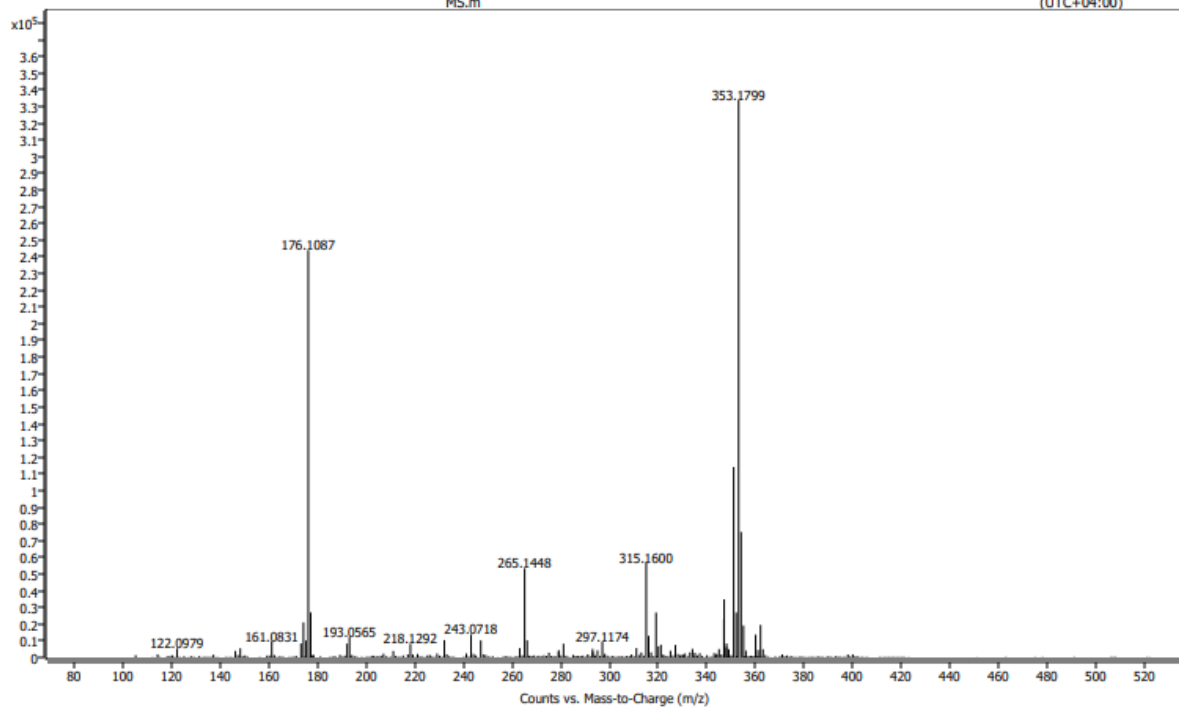

5m

### Spectrum Plot Report

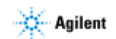

|              |         |                |                        |            |              |                                                   |
|--------------|---------|----------------|------------------------|------------|--------------|---------------------------------------------------|
| Sample Name  | HA-35   | Rack Position  |                        | Instrument | Instrument 1 | Acq Operator                                      |
| Inj Vol (ul) | 10      | Plate Position |                        | IRM Status | Success      |                                                   |
| Data File    | HA-35.d | Acq Method     | APCI POS ION DMSO MS.m | Comment    |              | Acq Time (Local) 21-May-24 2:30:06 PM (UTC+04:00) |

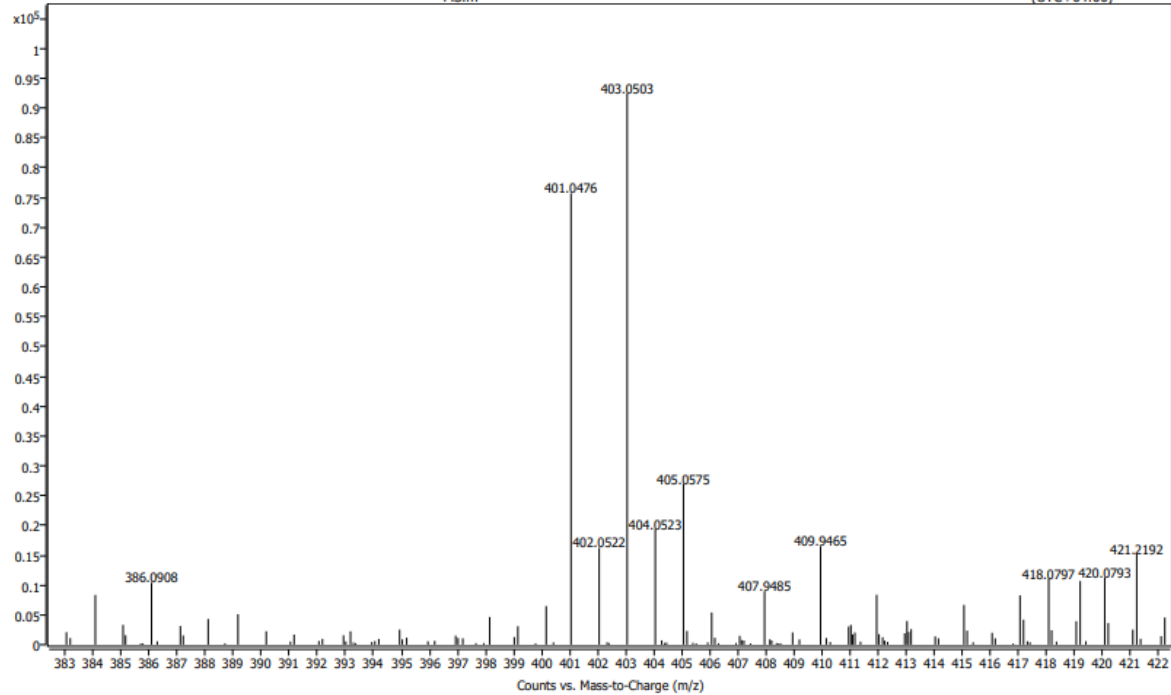

5n

### Spectrum Plot Report

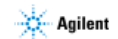

|              |         |                |                        |            |              |                                                   |
|--------------|---------|----------------|------------------------|------------|--------------|---------------------------------------------------|
| Sample Name  | HA-36   | Rack Position  |                        | Instrument | Instrument 1 | Acq Operator                                      |
| Inj Vol (ul) | 10      | Plate Position |                        | IRM Status | Success      |                                                   |
| Data File    | HA-36.d | Acq Method     | APCI POS ION DMSO MS.m | Comment    |              | Acq Time (Local) 21-May-24 2:35:34 PM (UTC+04:00) |

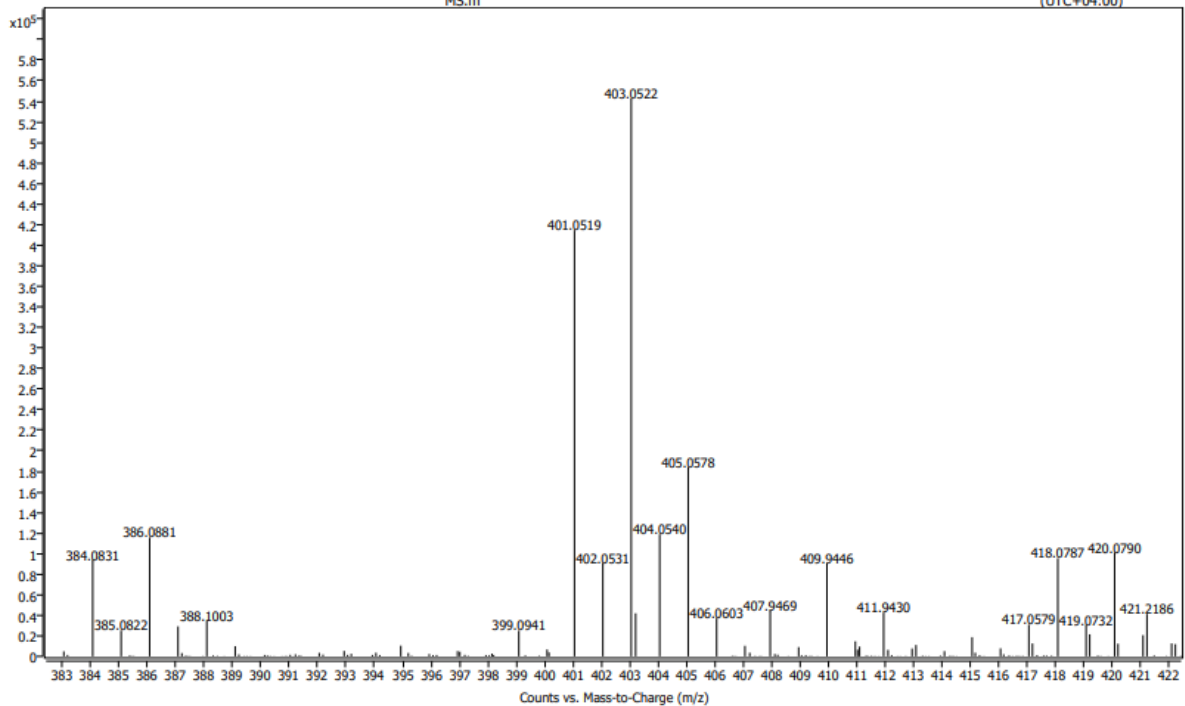

5o

### Spectrum Plot Report

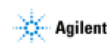

|              |         |                |                        |            |              |                                                   |
|--------------|---------|----------------|------------------------|------------|--------------|---------------------------------------------------|
| Sample Name  | HA-37   | Rack Position  |                        | Instrument | Instrument 1 | Acq Operator                                      |
| Inj Vol (ul) | 10      | Plate Position |                        | IRM Status | Success      |                                                   |
| Data File    | HA-37.d | Acq Method     | APCI POS ION DMSO MS.m | Comment    |              | Acq Time (Local) 21-May-24 2:41:07 PM (UTC+04:00) |

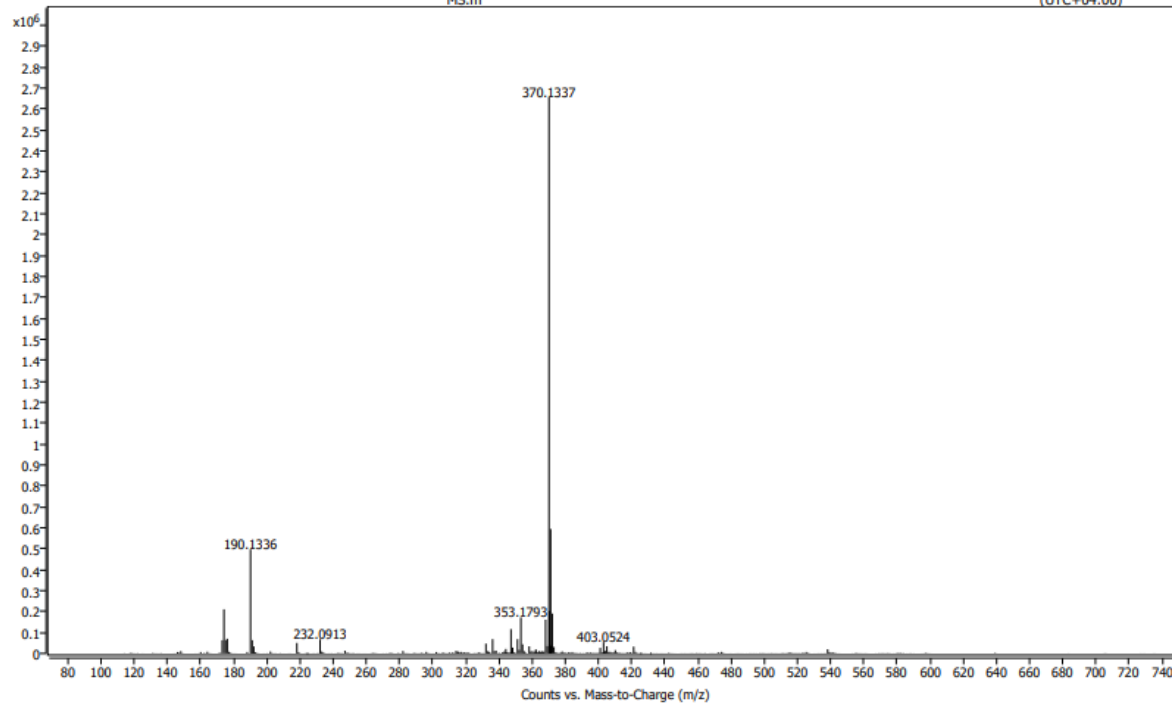

5p

### Spectrum Plot Report

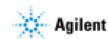

|              |         |                |                        |            |              |                                                   |
|--------------|---------|----------------|------------------------|------------|--------------|---------------------------------------------------|
| Sample Name  | HA-38   | Rack Position  |                        | Instrument | Instrument 1 | Acq Operator                                      |
| Inj Vol (ul) | 10      | Plate Position |                        | IRM Status | Success      |                                                   |
| Data File    | HA-38.d | Acq Method     | APCI POS ION DMSO MS.m | Comment    |              | Acq Time (Local) 21-May-24 2:46:30 PM (UTC+04:00) |

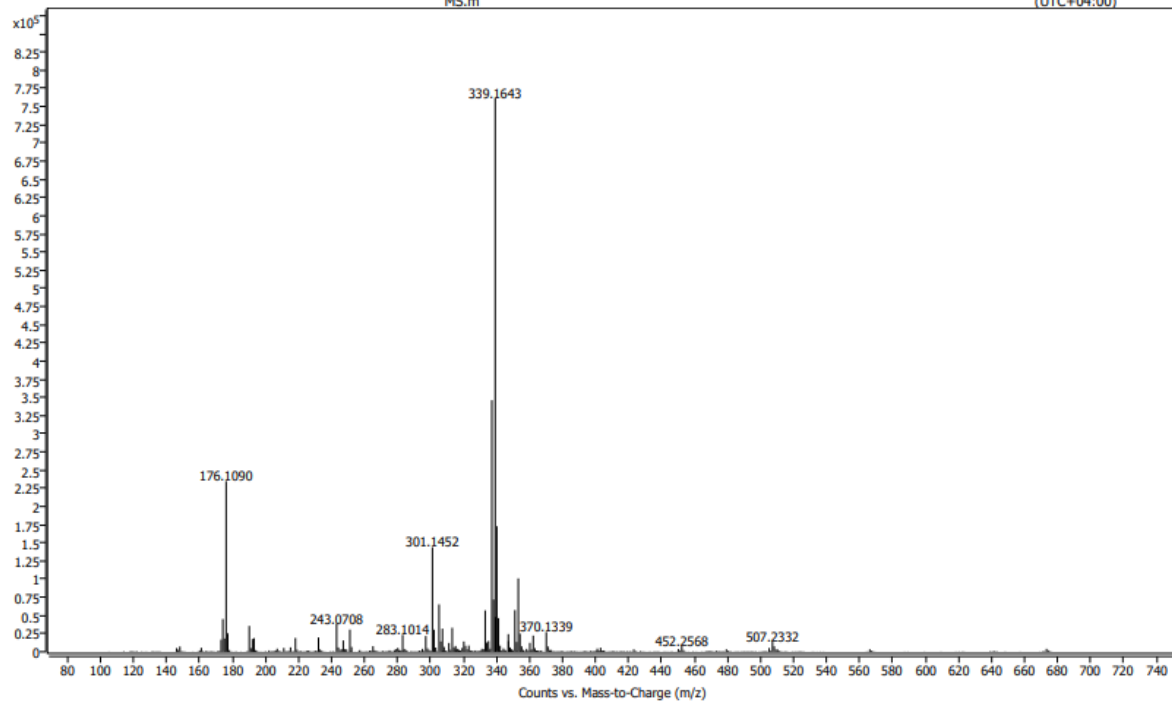

5q

### Spectrum Plot Report

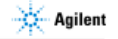

|              |         |                |                        |              |                                                   |
|--------------|---------|----------------|------------------------|--------------|---------------------------------------------------|
| Sample Name  | HA-39   | Rack Position  | Instrument             | Instrument 1 | Acq Operator                                      |
| Inj Vol (ul) | 10      | Plate Position | IRM Status             | Success      |                                                   |
| Data File    | HA-39.d | Acq Method     | APCI POS ION DMSO MS.m | Comment      | Acq Time (Local) 21-May-24 2:51:59 PM (UTC+04:00) |

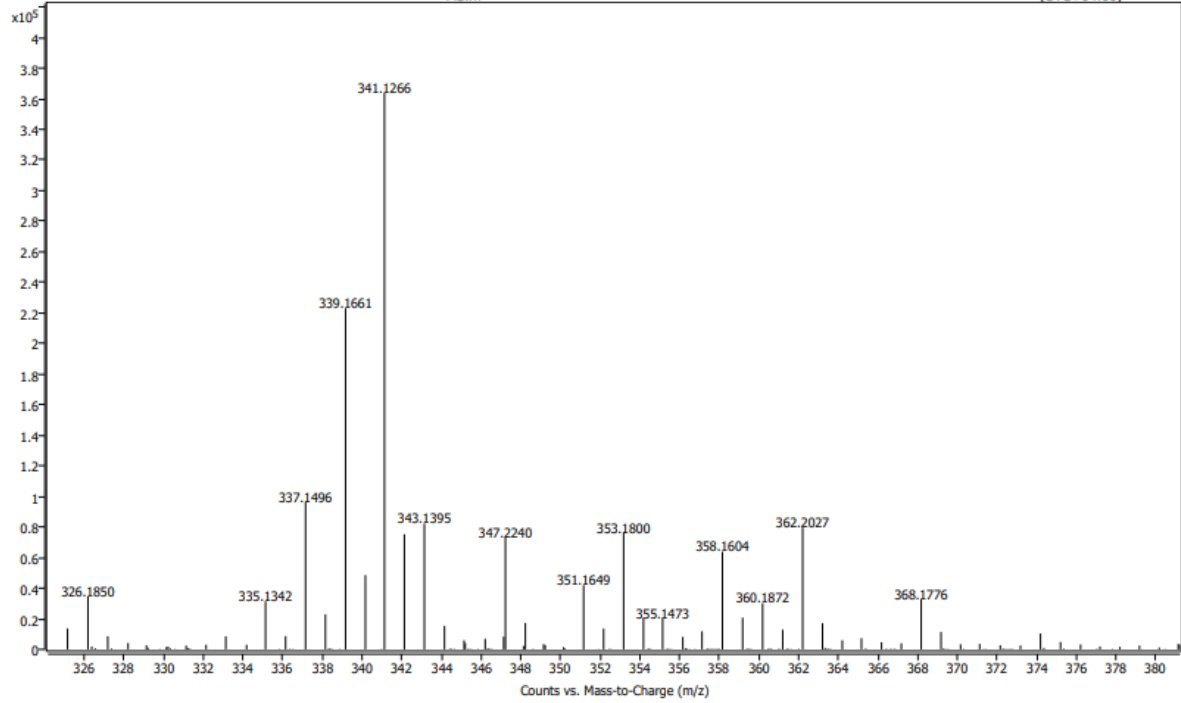

5r

### Spectrum Plot Report

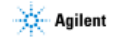

|              |         |                |                        |              |                                                   |
|--------------|---------|----------------|------------------------|--------------|---------------------------------------------------|
| Sample Name  | HA-40   | Rack Position  | Instrument             | Instrument 1 | Acq Operator                                      |
| Inj Vol (ul) | 10      | Plate Position | IRM Status             | Success      |                                                   |
| Data File    | HA-40.d | Acq Method     | APCI POS ION DMSO MS.m | Comment      | Acq Time (Local) 21-May-24 2:57:25 PM (UTC+04:00) |

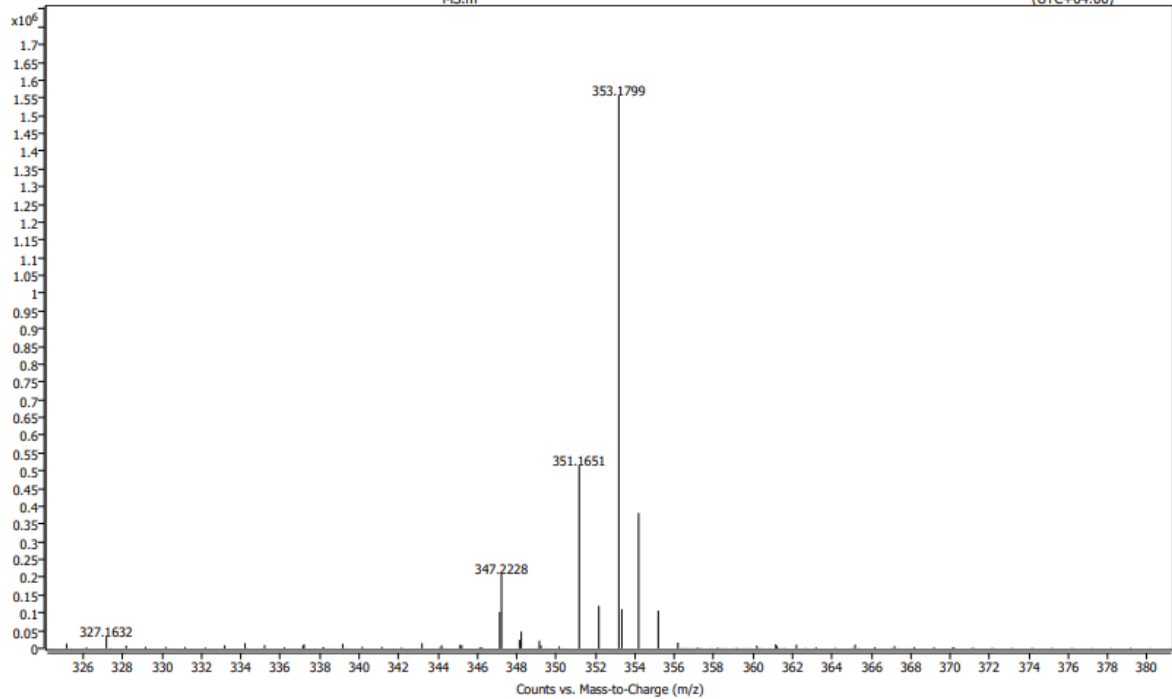

## HPLC chromatogram of 5a

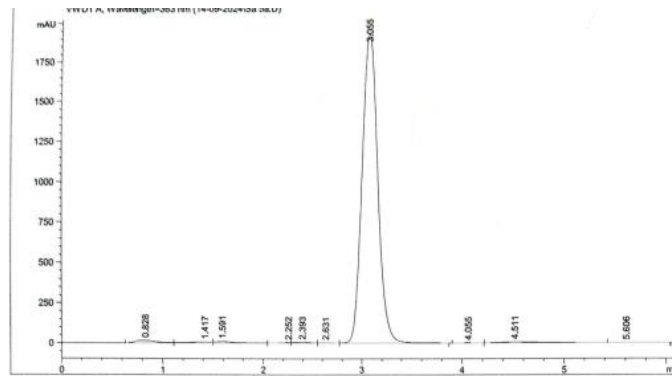

### Area Percent Report

Sorted By : Signal  
Multiplier : 1.0000  
Dilution : 1.0000  
Use Multiplier & Dilution Factor with ISTDs

Signal 1: VWD1 A, Wavelength=363 nm

| Peak # | RetTime [min] | Type | Width [min] | Area [mAU*s] | Height [mAU] | Area %  |
|--------|---------------|------|-------------|--------------|--------------|---------|
| 1      | 0.828         | BV   | 0.2247      | 220.97006    | 15.08996     | 1.0111  |
| 2      | 1.417         | VV   | 0.2112      | 118.47029    | 7.65351      | 0.5421  |
| 3      | 1.591         | VB   | 0.1769      | 114.48515    | 9.31631      | 0.5239  |
| 4      | 2.252         | BV   | 0.1063      | 19.22764     | 2.79957      | 0.0880  |
| 5      | 2.393         | VV   | 0.1583      | 52.85017     | 4.99728      | 0.2418  |
| 6      | 2.631         | VB   | 0.1396      | 13.79169     | 1.55979      | 0.0631  |
| 7      | 3.055         | BB   | 0.1699      | 2.11048e4    | 1928.44250   | 96.5745 |
| 8      | 4.055         | BB   | 0.1540      | 4.33859      | 4.52895e-1   | 0.0199  |
| 9      | 4.511         | BV R | 0.4419      | 199.41382    | 6.56117      | 0.9125  |
| 10     | 5.606         | VBAE | 0.2348      | 5.03643      | 2.94047e-1   | 0.0230  |

DIC 0/14/10/14 11:00:30 AM C:\MSDCHEM

Page 1 of 2

## HPLC chromatogram of 5b

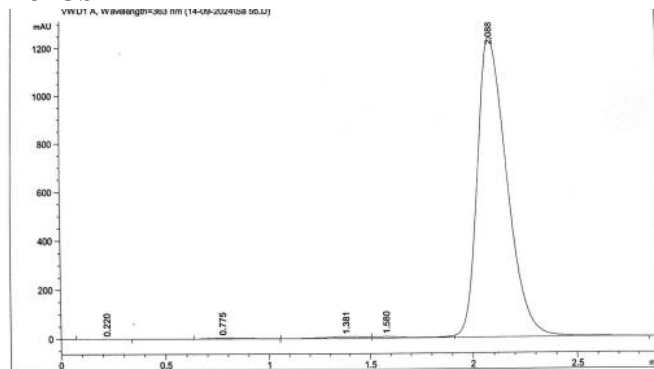

### Area Percent Report

Sorted By : Signal  
Multiplier : 1.0000  
Dilution : 1.0000  
Use Multiplier & Dilution Factor with ISTDs

Signal 1: VWD1 A, Wavelength=363 nm

| Peak # | RetTime [min] | Type | Width [min] | Area [mAU*s] | Height [mAU] | Area %   |
|--------|---------------|------|-------------|--------------|--------------|----------|
| 1      | 0.220         | BV   | 0.1044      | 2.91614e-1   | 3.66915e-2   | 2.318e-3 |
| 2      | 0.775         | BB   | 0.1677      | 47.14600     | 4.48620      | 0.3748   |
| 3      | 1.381         | BV E | 0.2049      | 104.36163    | 7.48348      | 0.8295   |
| 4      | 1.580         | VV E | 0.1740      | 80.38326     | 6.47262      | 0.6389   |
| 5      | 2.088         | VB R | 0.1528      | 1.23485e4    | 1253.52112   | 98.1544  |

## HPLC chromatogram of 5c

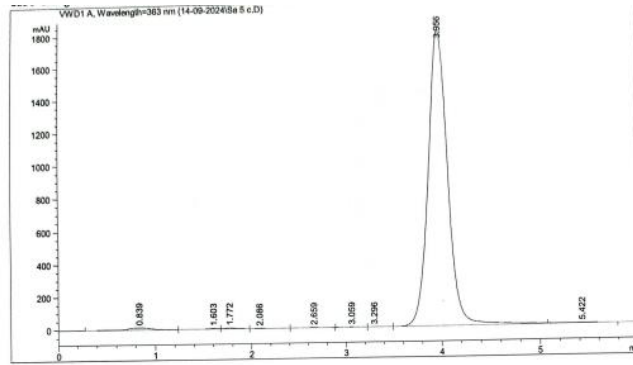

### Area Percent Report

Sorted By : Signal  
Multiplier : 1.0000  
Dilution : 1.0000  
Use Multiplier & Dilution Factor with ISTDs

Signal 1: WVD1 A, Wavelength=363 nm

| Peak # | RetTime [min] | Type | Width [min] | Area [mAU*s] | Height [mAU] | Area %  |
|--------|---------------|------|-------------|--------------|--------------|---------|
| 1      | 0.839         | BB   | 0.2622      | 223.03247    | 13.43007     | 0.8706  |
| 2      | 1.603         | BV   | 0.1376      | 47.98867     | 5.15921      | 0.1873  |
| 3      | 1.772         | VV   | 0.1577      | 70.17262     | 6.59256      | 0.2739  |
| 4      | 2.086         | VB   | 0.1593      | 23.48802     | 2.20387      | 0.0917  |
| 5      | 2.659         | BB   | 0.1885      | 22.90609     | 1.90270      | 0.0894  |
| 6      | 3.059         | BV   | 0.1705      | 19.77284     | 1.79870      | 0.0772  |
| 7      | 3.296         | VB   | 0.1617      | 7.72665      | 7.54708e-1   | 0.0302  |
| 8      | 3.956         | BV R | 0.2124      | 2.51757e4    | 1802.65649   | 98.2749 |
| 9      | 5.422         | VBAE | 0.2680      | 26.83294     | 1.45233      | 0.1047  |

## HPLC chromatogram of 5d

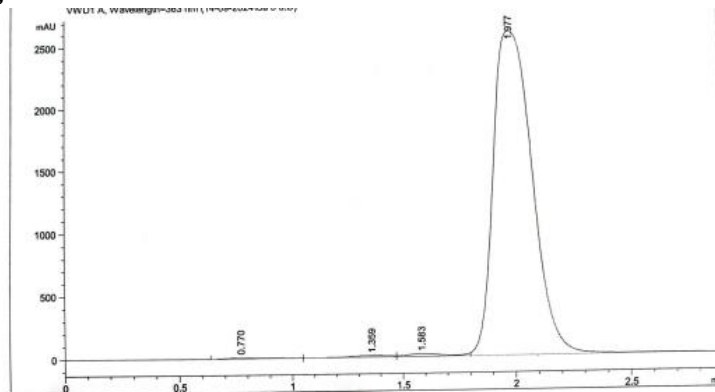

### Area Percent Report

Sorted By : Signal  
Multiplier : 1.0000  
Dilution : 1.0000  
Use Multiplier & Dilution Factor with ISTDs

Signal 1: WVD1 A, Wavelength=363 nm

| Peak #   | RetTime [min] | Type | Width [min] | Area [mAU*s] | Height [mAU] | Area %  |
|----------|---------------|------|-------------|--------------|--------------|---------|
| 1        | 0.770         | BB   | 0.1510      | 107.91707    | 10.45714     | 0.3462  |
| 2        | 1.359         | BV E | 0.1920      | 163.36404    | 13.37330     | 0.5241  |
| 3        | 1.583         | VV E | 0.1576      | 241.43596    | 22.60774     | 0.7745  |
| 4        | 1.977         | VBAR | 0.1857      | 3.06596e4    | 2598.65601   | 98.3552 |
| Totals : |               |      |             | 3.11724e4    | 2645.18419   |         |

## HPLC chromatogram of 5e

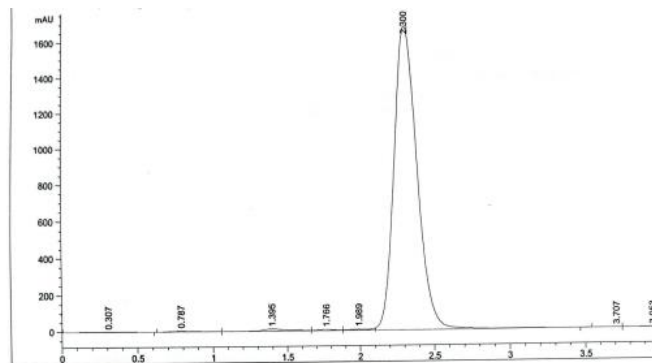

### Area Percent Report

Sorted By : Signal  
Multiplier : 1.0000  
Dilution : 1.0000  
Use Multiplier & Dilution Factor with ISTDs

Signal 1: VWD1 A, Wavelength=363 nm

| Peak # | RetTime [min] | Type | Width [min] | Area [mAU*s] | Height [mAU] | Area %   |
|--------|---------------|------|-------------|--------------|--------------|----------|
| 1      | 0.307         | BB   | 0.2078      | 20.26543     | 1.50706      | 0.1099   |
| 2      | 0.787         | BB   | 0.1637      | 56.14553     | 5.32858      | 0.3046   |
| 3      | 1.395         | BV E | 0.1927      | 170.49765    | 12.49250     | 0.9250   |
| 4      | 1.766         | VV E | 0.1500      | 68.69591     | 6.79330      | 0.3727   |
| 5      | 1.989         | VV E | 0.1393      | 59.01897     | 6.17034      | 0.3202   |
| 6      | 2.300         | VB R | 0.1660      | 1.80546e4    | 1682.05115   | 97.9513  |
| 7      | 3.707         | BV   | 0.1080      | 7.24892e-1   | 9.34527e-2   | 3.933e-3 |
| 8      | 3.953         | VBA  | 0.1275      | 2.26344      | 2.46534e-1   | 0.0123   |

## HPLC chromatogram of 5f

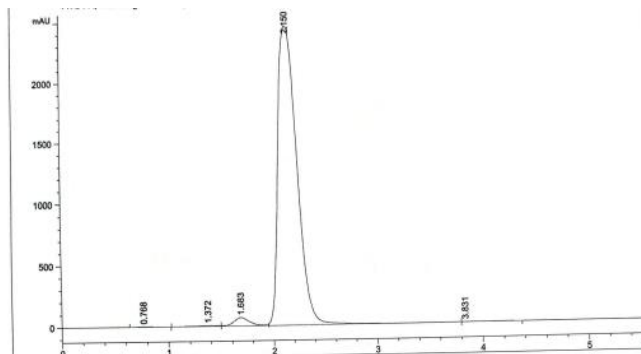

### Area Percent Report

Sorted By : Signal  
Multiplier : 1.0000  
Dilution : 1.0000  
Use Multiplier & Dilution Factor with ISTDs

Signal 1: VWD1 A, Wavelength=363 nm

| Peak # | RetTime [min] | Type | Width [min] | Area [mAU*s] | Height [mAU] | Area %   |
|--------|---------------|------|-------------|--------------|--------------|----------|
| 1      | 0.768         | BB   | 0.1425      | 7.32521      | 7.94550e-1   | 0.0232   |
| 2      | 1.372         | BV E | 0.1607      | 66.46423     | 6.23718      | 0.2104   |
| 3      | 1.683         | VV E | 0.1558      | 709.17096    | 69.32246     | 2.2452   |
| 4      | 2.150         | VB R | 0.1991      | 3.08026e4    | 2449.22681   | 97.5187  |
| 5      | 3.831         | BB   | 0.3047      | 8.01374e-1   | 3.19033e-2   | 2.537e-3 |



## HPLC chromatogram of 5g

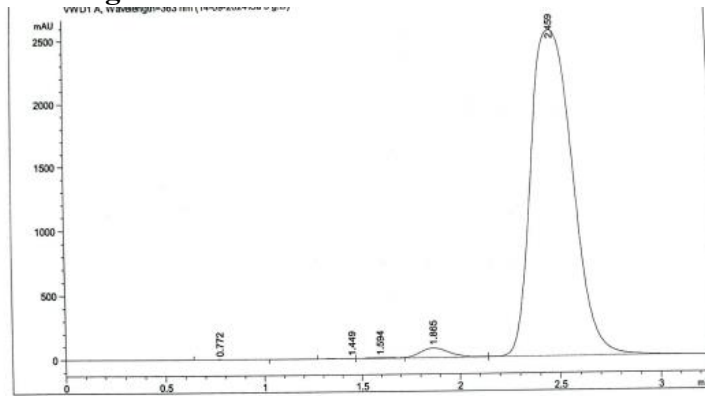

### Area Percent Report

Sorted By : Signal  
Multiplier : 1.0000  
Dilution : 1.0000  
Use Multiplier & Dilution Factor with ISTDs

Signal 1: WMD1 A, Wavelength=363 nm

| Peak # | RetTime [min] | Type | Width [min] | Area [mAU*s] | Height [mAU] | Area %  |
|--------|---------------|------|-------------|--------------|--------------|---------|
| 1      | 0.772         | BB   | 0.1490      | 4.73922      | 4.90860e-1   | 0.0127  |
| 2      | 1.449         | BV E | 0.0994      | 10.66048     | 1.69837      | 0.0286  |
| 3      | 1.594         | VV E | 0.1364      | 38.11235     | 4.26230      | 0.1023  |
| 4      | 1.865         | VR   | 0.1597      | 790.89423    | 76.62309     | 2.1229  |
| 5      | 2.459         | VBA  | 0.2296      | 3.64106e4    | 2543.97217   | 97.7334 |

## HPLC chromatogram of 5h

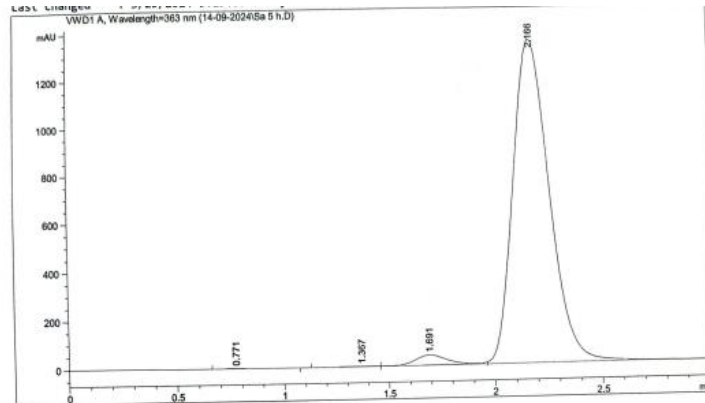

### Area Percent Report

Sorted By : Signal  
Multiplier : 1.0000  
Dilution : 1.0000  
Use Multiplier & Dilution Factor with ISTDs

Signal 1: WMD1 A, Wavelength=363 nm

| Peak # | RetTime [min] | Type | Width [min] | Area [mAU*s] | Height [mAU] | Area %  |
|--------|---------------|------|-------------|--------------|--------------|---------|
| 1      | 0.771         | BB   | 0.1591      | 2.83867      | 2.69833e-1   | 0.0175  |
| 2      | 1.367         | BV E | 0.1471      | 7.49101      | 7.68937e-1   | 0.0462  |
| 3      | 1.691         | VV E | 0.1589      | 449.61575    | 43.32738     | 2.7737  |
| 4      | 2.166         | VBAR | 0.1822      | 1.57502e4    | 1355.52893   | 97.1626 |

## HPLC chromatogram of 5i

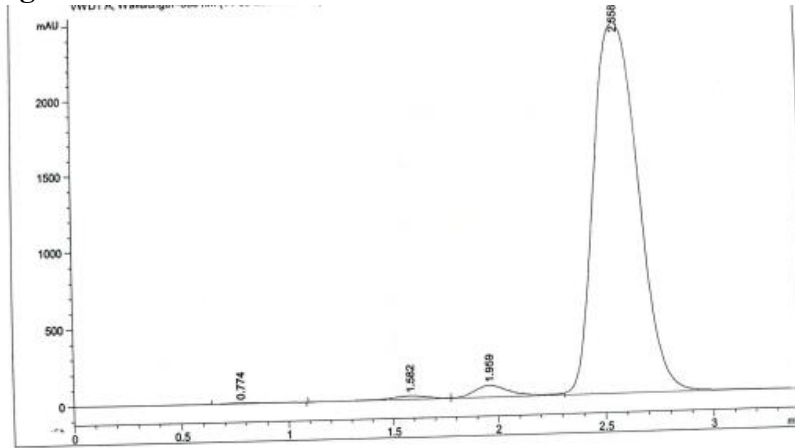

### Area Percent Report

Sorted By : Signal  
Multiplier : 1.0000  
Dilution : 1.0000  
Use Multiplier & Dilution Factor with ISTDs

Signal 1: VMD1 A, Wavelength=363 nm

| Peak # | RetTime [min] | Type | Width [min] | Area [mAU*s] | Height [mAU] | Area %  |
|--------|---------------|------|-------------|--------------|--------------|---------|
| 1      | 0.774         | BB   | 0.1670      | 46.44295     | 4.39282      | 0.1294  |
| 2      | 1.582         | BV E | 0.2004      | 329.60278    | 24.53732     | 0.9181  |
| 3      | 1.959         | VV E | 0.1884      | 936.61987    | 79.07034     | 2.6090  |
| 4      | 2.558         | VBAR | 0.2283      | 3.45876e4    | 2434.81543   | 96.3436 |

## HPLC chromatogram of 5j

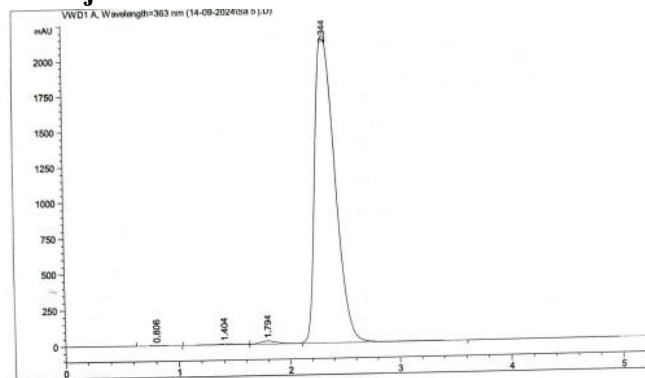

### Area Percent Report

Sorted By : Signal  
Multiplier : 1.0000  
Dilution : 1.0000  
Use Multiplier & Dilution Factor with ISTDs

Signal 1: VMD1 A, Wavelength=363 nm

| Peak # | RetTime [min] | Type | Width [min] | Area [mAU*s] | Height [mAU] | Area %  |
|--------|---------------|------|-------------|--------------|--------------|---------|
| 1      | 0.806         | BB   | 0.1375      | 7.79837      | 8.50758e-1   | 0.0282  |
| 2      | 1.404         | BV E | 0.1821      | 82.34154     | 6.46454      | 0.2974  |
| 3      | 1.794         | VV E | 0.1694      | 231.76300    | 21.02710     | 0.8372  |
| 4      | 2.344         | VB R | 0.2021      | 2.73620e4    | 2153.67236   | 98.8372 |

## HPLC chromatogram of 5k

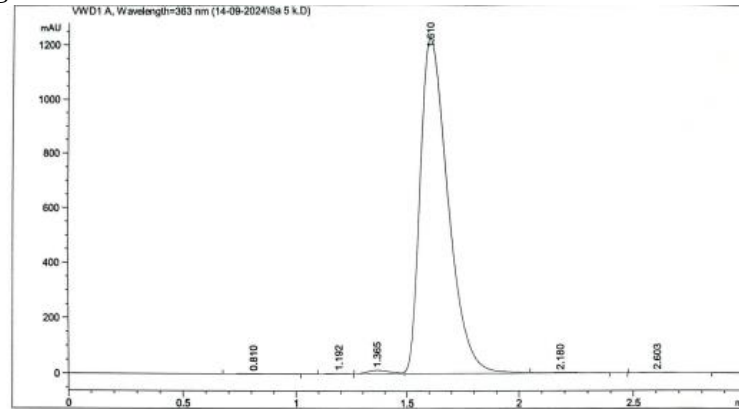

### Area Percent Report

Sorted By : Signal  
Multiplier : 1.0000  
Dilution : 1.0000  
Use Multiplier & Dilution Factor with ISTDs

Signal 1: WVD1 A, Wavelength=363 nm

| Peak # | RetTime [min] | Type | Width [min] | Area [mAU*s] | Height [mAU] | Area %  |
|--------|---------------|------|-------------|--------------|--------------|---------|
| 1      | 0.810         | BB   | 0.1434      | 5.51140      | 5.62803e-1   | 0.0514  |
| 2      | 1.192         | BB   | 0.0927      | 8.20703      | 1.50632      | 0.0766  |
| 3      | 1.365         | BV E | 0.1116      | 84.40572     | 11.93555     | 0.7877  |
| 4      | 1.610         | VV R | 0.1333      | 1.05932e4    | 1220.40430   | 98.8621 |
| 5      | 2.180         | VB E | 0.1447      | 10.35813     | 1.05932      | 0.0967  |
| 6      | 2.603         | BB   | 0.1443      | 13.44899     | 1.45368      | 0.1255  |

Totals : 1.07151e4 1236.92198

## HPLC chromatogram of 5l

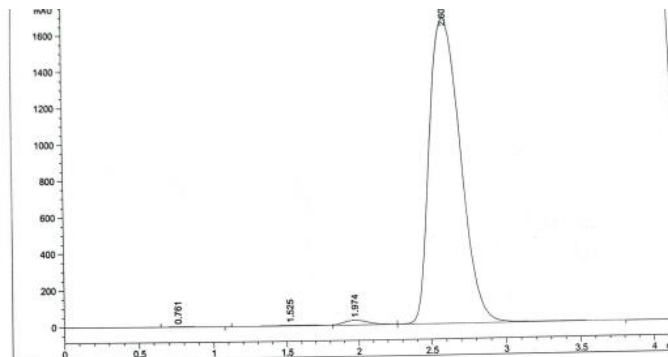

### Area Percent Report

Sorted By : Signal  
Multiplier : 1.0000  
Dilution : 1.0000  
Use Multiplier & Dilution Factor with ISTDs

Signal 1: WVD1 A, Wavelength=363 nm

| Peak # | RetTime [min] | Type | Width [min] | Area [mAU*s] | Height [mAU] | Area %  |
|--------|---------------|------|-------------|--------------|--------------|---------|
| 1      | 0.761         | BB   | 0.1521      | 8.26315      | 8.22819e-1   | 0.0331  |
| 2      | 1.525         | BV E | 0.2273      | 59.29700     | 3.65220      | 0.2372  |
| 3      | 1.974         | VV R | 0.1882      | 325.96219    | 26.85067     | 1.3041  |
| 4      | 2.608         | VB   | 0.2356      | 2.46018e4    | 1688.04285   | 98.4256 |

## HPLC chromatogram of 5m

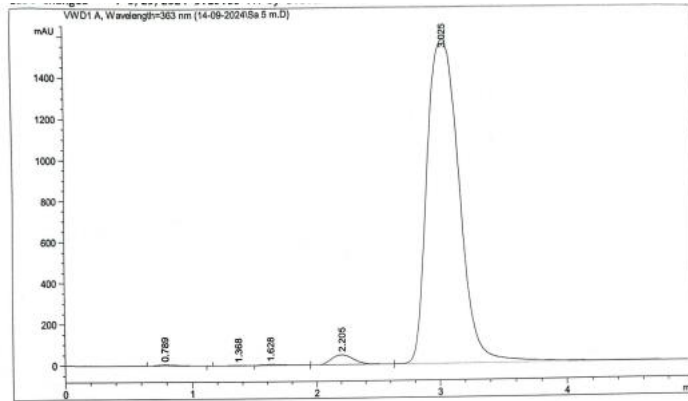

### Area Percent Report

Sorted By : Signal  
Multiplier : 1.0000  
Dilution : 1.0000  
Use Multiplier & Dilution Factor with ISTDs

Signal 1: Vwd1 A, Wavelength=363 nm

| Peak # | RetTime [min] | Type | Width [min] | Area [mAU*s] | Height [mAU] | Area %  |
|--------|---------------|------|-------------|--------------|--------------|---------|
| 1      | 0.789         | BB   | 0.1356      | 44.72926     | 5.11155      | 0.1559  |
| 2      | 1.368         | BV E | 0.1553      | 3.35077      | 3.45758e-1   | 0.0117  |
| 3      | 1.628         | VB R | 0.1688      | 53.31473     | 4.91221      | 0.1858  |
| 4      | 2.205         | BV   | 0.2055      | 631.26990    | 49.05482     | 2.2005  |
| 5      | 3.025         | VBA  | 0.2842      | 2.79544e4    | 1575.01587   | 97.4468 |

## HPLC chromatogram of 5n

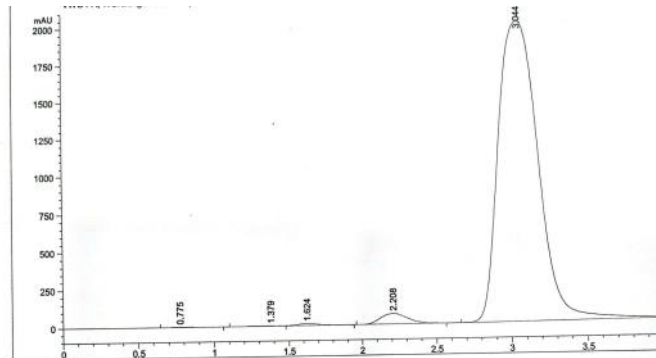

### Area Percent Report

Sorted By : Signal  
Multiplier : 1.0000  
Dilution : 1.0000  
Use Multiplier & Dilution Factor with ISTDs

Signal 1: Vwd1 A, Wavelength=363 nm

| Peak # | RetTime [min] | Type | Width [min] | Area [mAU*s] | Height [mAU] | Area %  |
|--------|---------------|------|-------------|--------------|--------------|---------|
| 1      | 0.775         | BB   | 0.1587      | 7.60358      | 7.33850e-1   | 0.0204  |
| 2      | 1.379         | BV E | 0.1539      | 9.15810      | 8.76571e-1   | 0.0245  |
| 3      | 1.624         | VB R | 0.1616      | 129.77696    | 12.38212     | 0.3475  |
| 4      | 2.208         | BB   | 0.2025      | 907.47040    | 71.91394     | 2.4297  |
| 5      | 3.044         | BBA  | 0.2920      | 3.62953e4    | 1998.35449   | 97.1780 |

## HPLC chromatogram of 5o

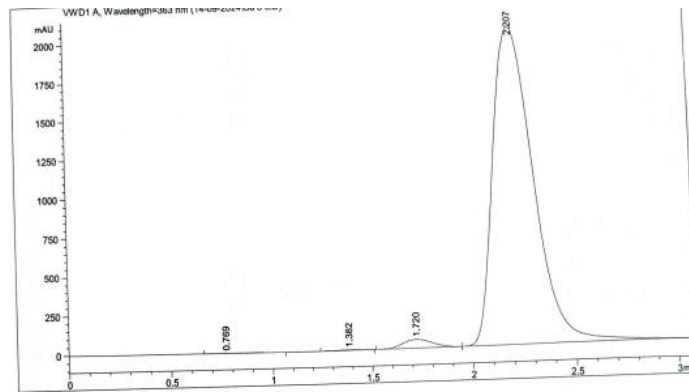

### Area Percent Report

Sorted By : Signal  
Multiplier : 1.0000  
Dilution : 1.0000  
Use Multiplier & Dilution Factor with ISTDs

Signal 1: VMD1 A, Wavelength=363 nm

| Peak # | RetTime [min] | Type | Width [min] | Area [mAU*s] | Height [mAU] | Area %  |
|--------|---------------|------|-------------|--------------|--------------|---------|
| 1      | 0.769         | BB   | 0.1796      | 7.29650      | 6.06951e-1   | 0.0258  |
| 2      | 1.382         | BB   | 0.1329      | 15.98338     | 1.98306      | 0.0562  |
| 3      | 1.720         | BB   | 0.1625      | 575.58179    | 55.83282     | 2.0327  |
| 4      | 2.207         | BBA  | 0.2149      | 2.77167e4    | 2045.55811   | 97.8853 |

## HPLC chromatogram of 5p

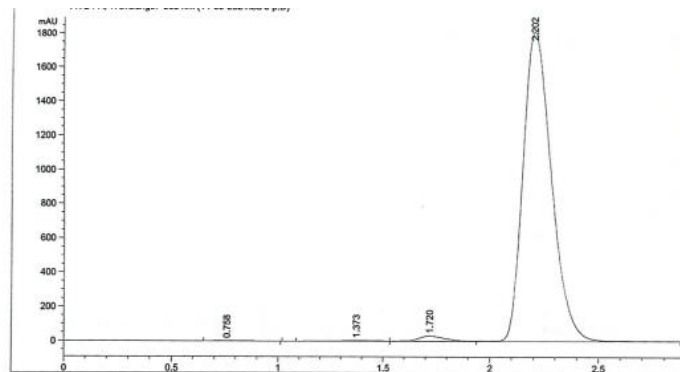

### Area Percent Report

Sorted By : Signal  
Multiplier : 1.0000  
Dilution : 1.0000  
Use Multiplier & Dilution Factor with ISTDs

Signal 1: VMD1 A, Wavelength=363 nm

| Peak # | RetTime [min] | Type | Width [min] | Area [mAU*s] | Height [mAU] | Area %  |
|--------|---------------|------|-------------|--------------|--------------|---------|
| 1      | 0.758         | BB   | 0.1267      | 13.17538     | 1.59848      | 0.0784  |
| 2      | 1.373         | BV E | 0.1453      | 45.15085     | 4.59325      | 0.2688  |
| 3      | 1.720         | VV E | 0.1306      | 254.05200    | 30.06845     | 1.5122  |
| 4      | 2.202         | VB R | 0.1413      | 1.64875e4    | 1808.41406   | 98.1406 |

## HPLC chromatogram of 5q

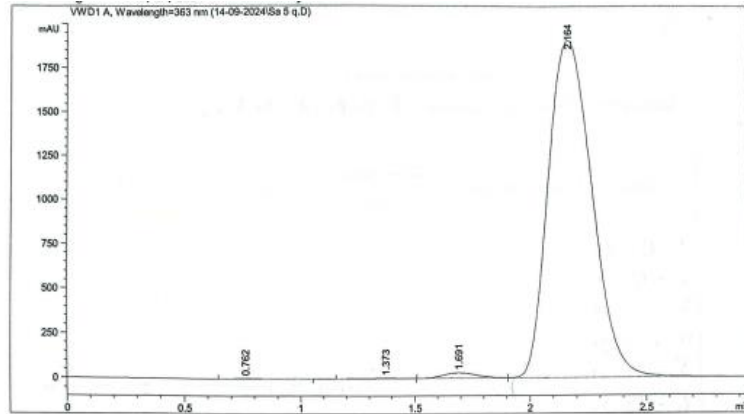

### Area Percent Report

Sorted By : Signal  
Multiplier : 1.0000  
Dilution : 1.0000  
Use Multiplier & Dilution Factor with ISTDs

Signal 1: WDI A, Wavelength=363 nm

| Peak # | RetTime [min] | Type | Width [min] | Area [mAU*s] | Height [mAU] | Area %  |
|--------|---------------|------|-------------|--------------|--------------|---------|
| 1      | 0.762         | BB   | 0.1510      | 4.99847      | 5.21913e-1   | 0.0199  |
| 2      | 1.373         | BB   | 0.1423      | 15.47462     | 1.75311      | 0.0617  |
| 3      | 1.691         | BV   | 0.1621      | 309.19778    | 30.07982     | 1.2318  |
| 4      | 2.164         | VBA  | 0.2084      | 2.47707e4    | 1905.47839   | 98.6866 |

## HPLC chromatogram of 5r

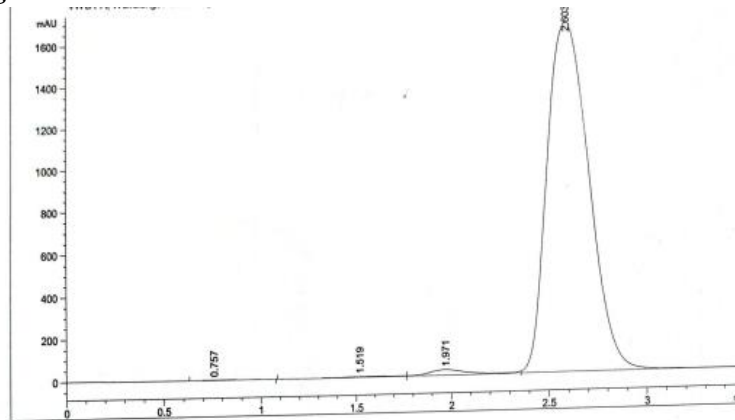

### Area Percent Report

Sorted By : Signal  
Multiplier : 1.0000  
Dilution : 1.0000  
Use Multiplier & Dilution Factor with ISTDs

Signal 1: WDI A, Wavelength=363 nm

| Peak # | RetTime [min] | Type | Width [min] | Area [mAU*s] | Height [mAU] | Area %  |
|--------|---------------|------|-------------|--------------|--------------|---------|
| 1      | 0.757         | BB   | 0.1495      | 8.33536      | 8.48565e-1   | 0.0333  |
| 2      | 1.519         | BV E | 0.2140      | 53.85298     | 3.65053      | 0.2149  |
| 3      | 1.971         | VV E | 0.2027      | 353.25421    | 26.39203     | 1.4098  |
| 4      | 2.603         | VBAR | 0.2398      | 2.46416e4    | 1663.11511   | 98.3420 |

Total: 2.50571e4 1694.01424
